# Supplementary material for: Preclinical assessment of the efficacy and specificity of GD2-B7H3 SynNotch CAR-T in metastatic neuroblastoma
Source: PubMed Central journal article supplement (PMC7820416; doi:10.1038/s41467-020-20785-x), 2021-01-21
Supplement: 41467_2020_20785_MOESM1_ESM.pdf [file 41467_2020_20785_MOESM1_ESM.pdf]

Preclinical Assessment of the Efficacy and Specificity of GD2-B7H3 SynNotch CAR-T in Metastatic Neuroblastoma

First Author: Babak Moghimi

Corresponding Author: Shahab Asgharzadeh

### **Supplementary information**

Supplementary Figures 1-18

Supplementary Tables 1,2



## Supplementary Figure 1.

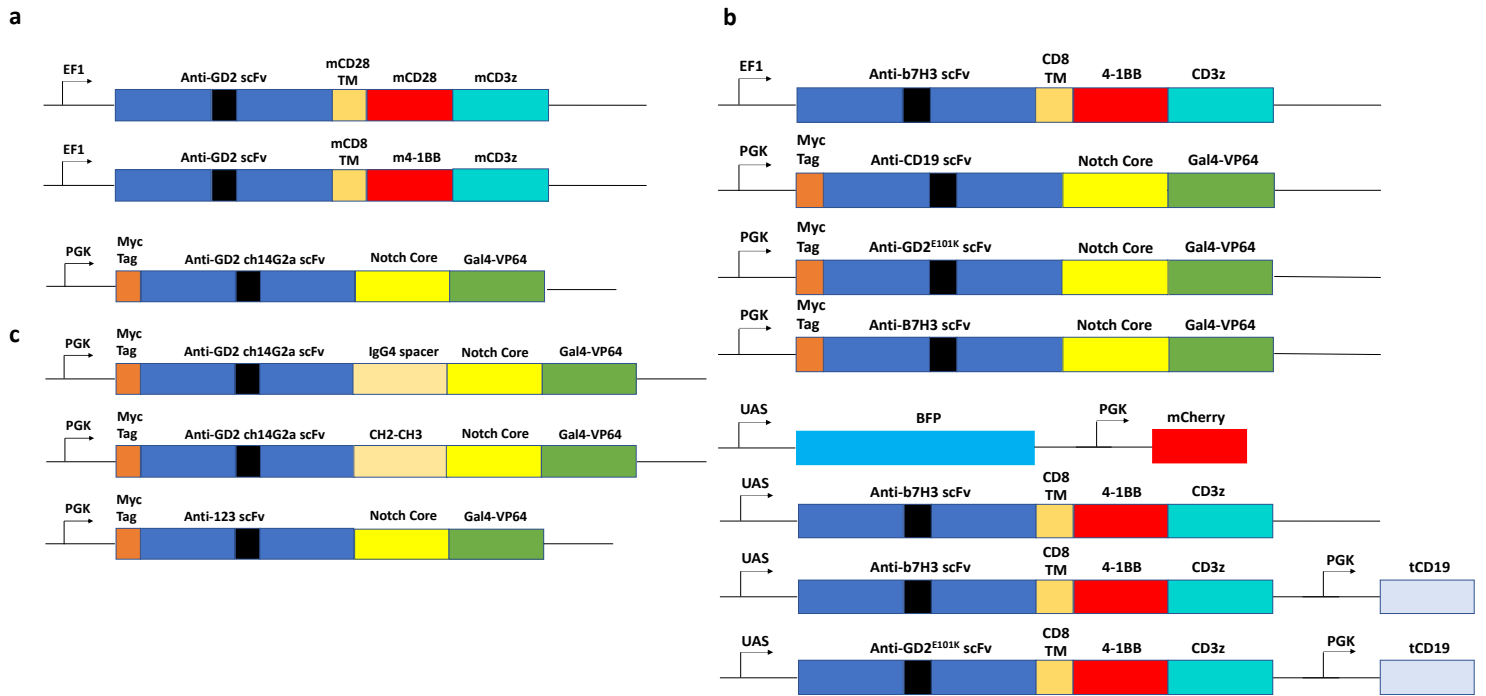

**Supplementary Figure 1. Structure of CAR constructs. a** Structures of murine GD2-28z and GD2-BBz CARs **b** Structures of B7H3-BBz, CD19-SynNotch, GD2<sup>E101K</sup>-SynNotch, B7H3-SynNotch, Upstream activation sequence (UAS) responsive B7H3-BBz CAR, UAS responsive B7H3-BBz or GD2<sup>E101K</sup>-BBz with PGK controlled truncated human CD19, UAS responsive BFP and PGK controlled mCherry. **c** Structures of SynNotch receptors for GD2 scFv (wildtype – corresponding to GD2 Chimeric 14G2a scFv) with no linker, IgG4, and CH2-CH3 linker, and SynNotch receptor for CD123 scFv.

## Supplementary Figure 2.

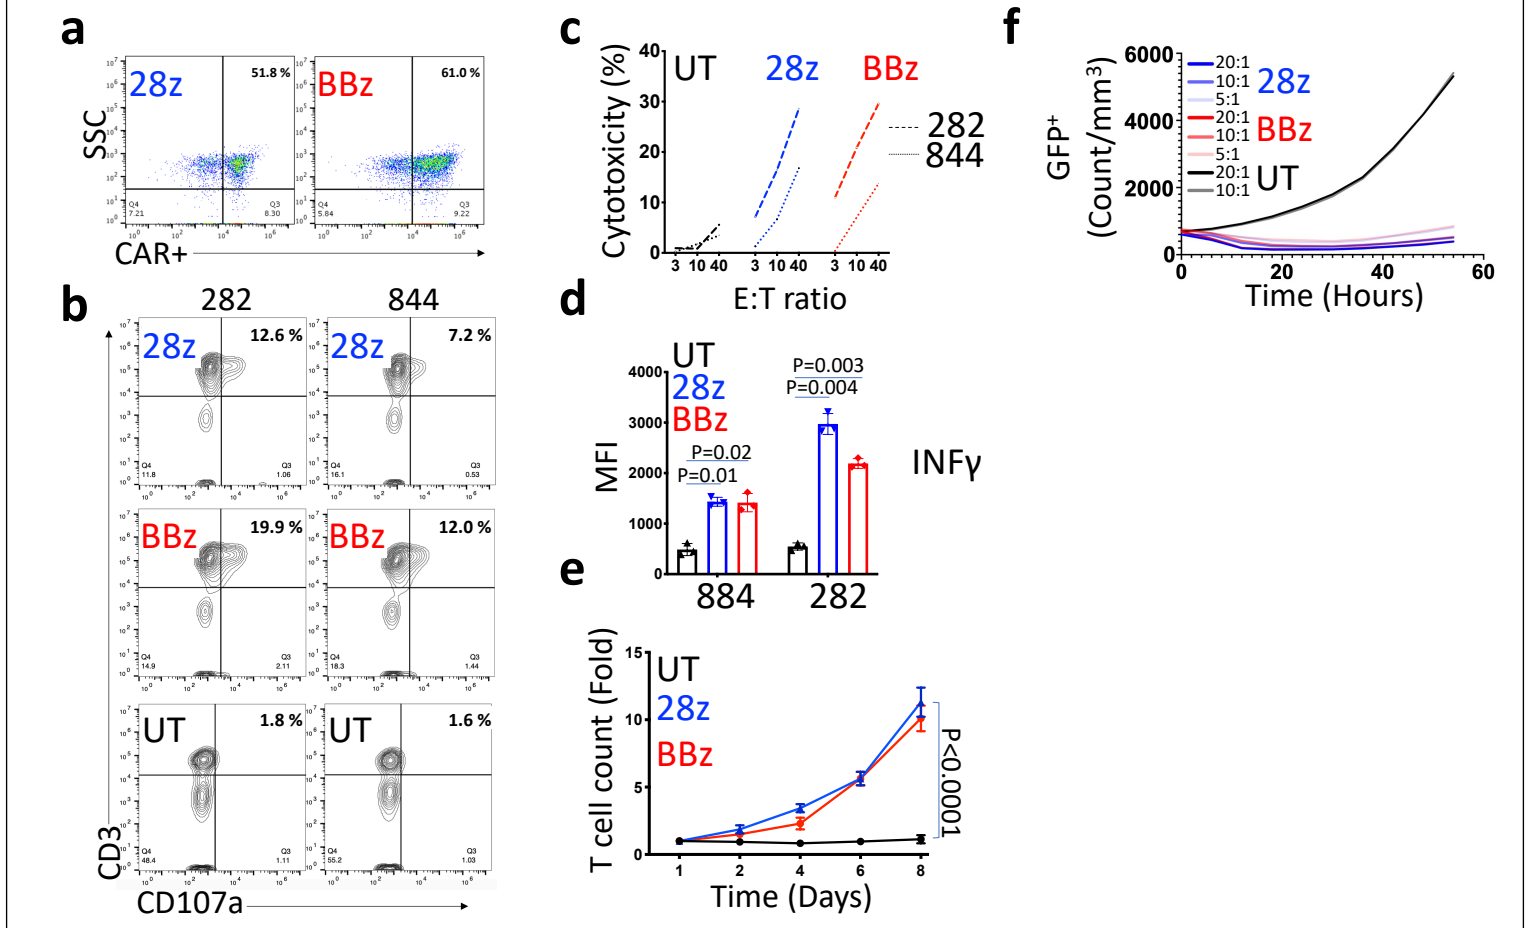

**Supplementary Figure 2. Murine GD2 CARs show anti-tumor efficacy *in vitro* and *in vivo*.** **a** Enumeration by flow cytometry of murine T cells transduced with retrovirus to express murine GD2-28z (28z) and GD2-BBz (BBz) construct. **b** Activation marker (CD107a) expression enumerated by flow cytometry in transduced T cells co-cultured with TH-MYCN murine NBL cell lines 282 and 844 for 4 hours. **c** Representation of cytotoxicity data from UT, GD2-28z, and GD2-BBz murine CAR-T cells co-cultured with murine TH-MYC NBL cell lines 282 and 844 for 12 hours at indicated E:T ratios. **d** Average IFN $\gamma$  expression level in murine T cells by flow cytometry. **e** Average fold expansion of UT, GD2-28z, and GD2-BBz murine CAR-T cells co-cultured for 8 days with 282 murine NBL cells at 1:1 Effector:Target ratio. **f** Kinetics of average cytotoxicity of UT, murine GD2-28z and GD2-BBz CAR-T cells using live-cell imaging (enumeration of GFP $^{+}$  tumor cells) against 9464<sup>GD2 $^{+}$</sup>  murine NBL cells at indicated E:T ratios. Data shown are representative of three independent experiments (**a-e**). mean for minimum of 4 replicate (**f**). mean $\pm$ SD (**d**, **e**). Two-tailed t-test (**d**, **e**). Source data are provided as a Source Data file.

### Supplementary Figure 3.

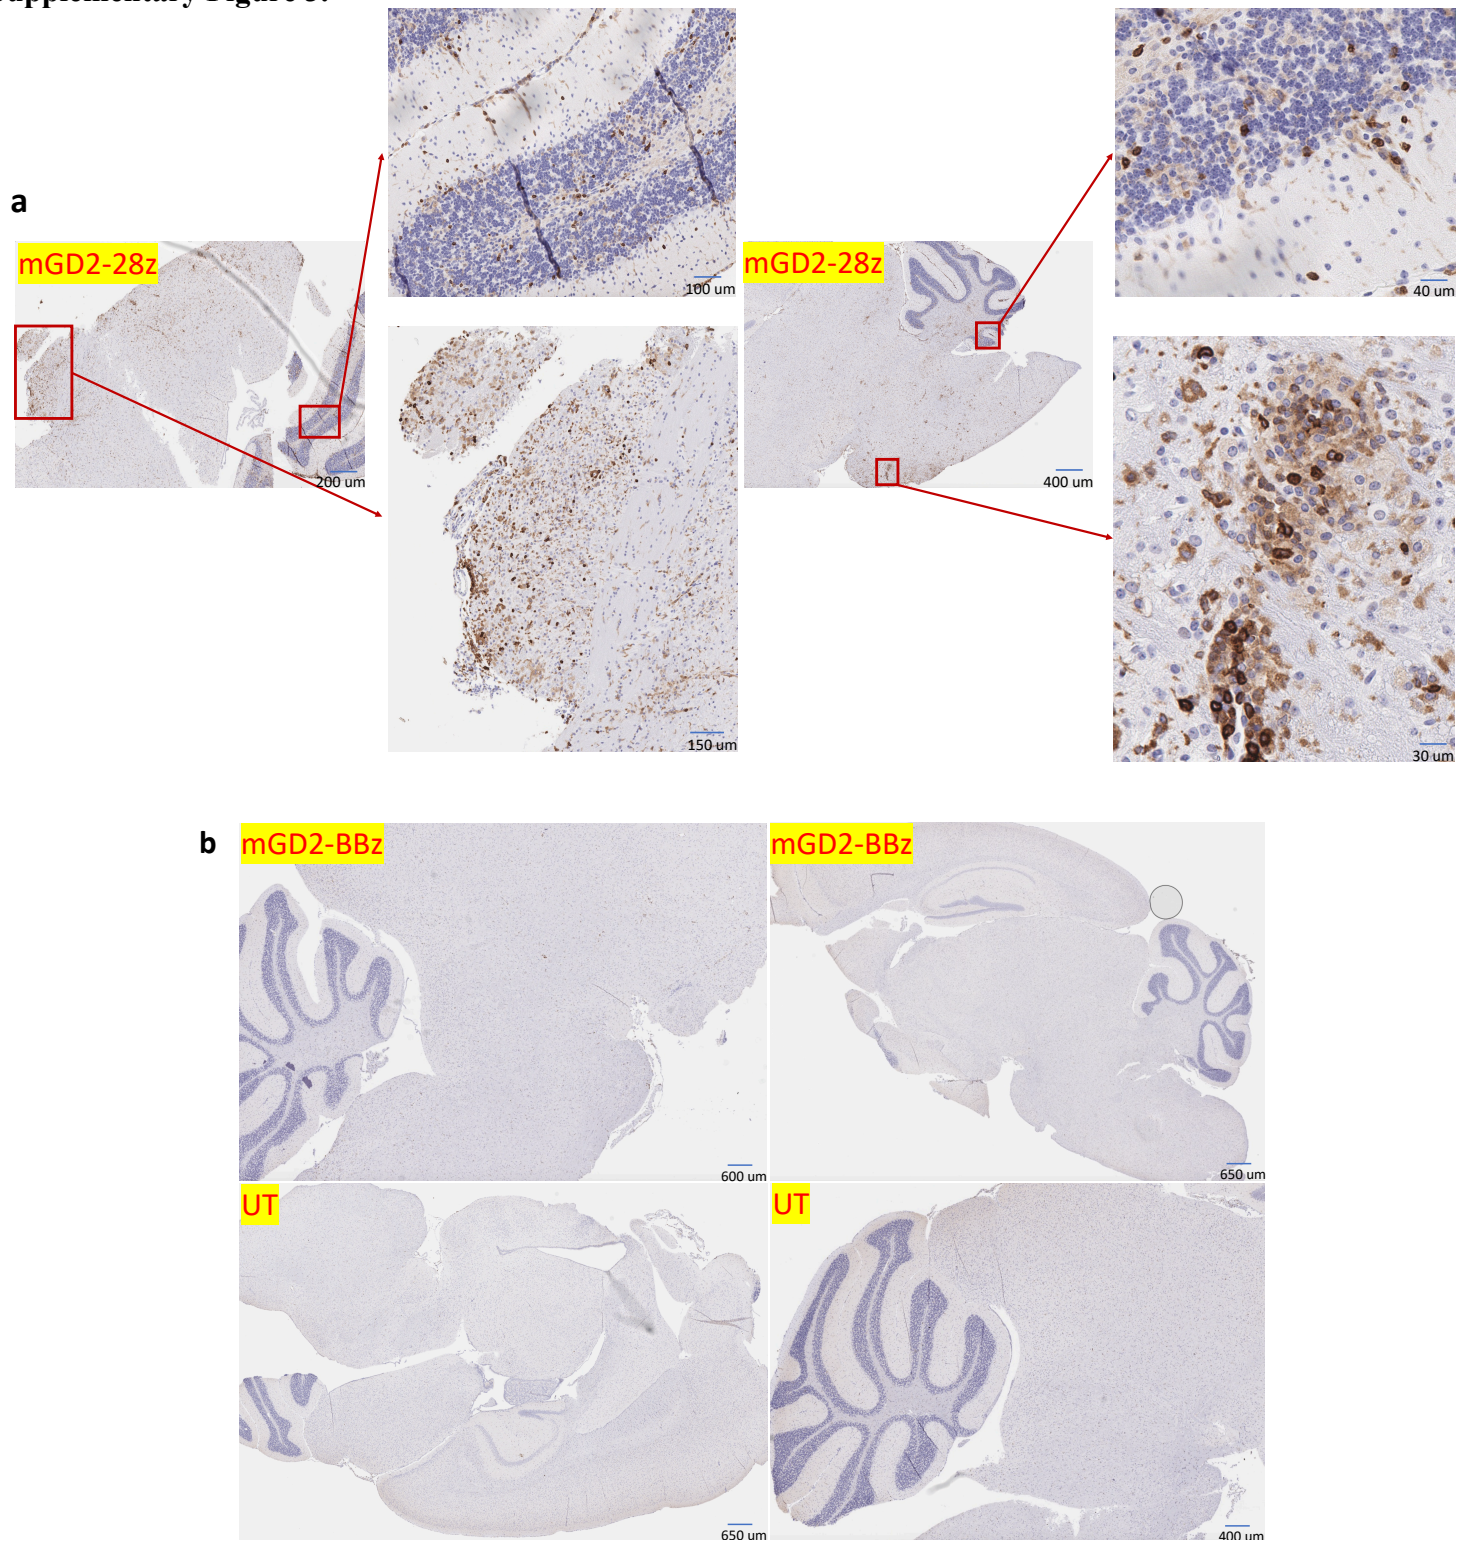

**Supplementary Figure 3. Immunohistochemical analysis of brain tissue from immunocompetent mice treated with murine GD2-28z.** Additional immunohistochemical analysis of CD3 (brown) in the brain of **a** animals treated with GD2-28z CAR-T cells, showing various regions of the central nervous system, and **b** animals treated with GD2-BBz CAR-T cells or UT cells, showing no infiltration in the central nervous system. Data shown are representative of the additional images from mice in Fig. 1c, no live animal was excluded.

## Supplementary Figure 4

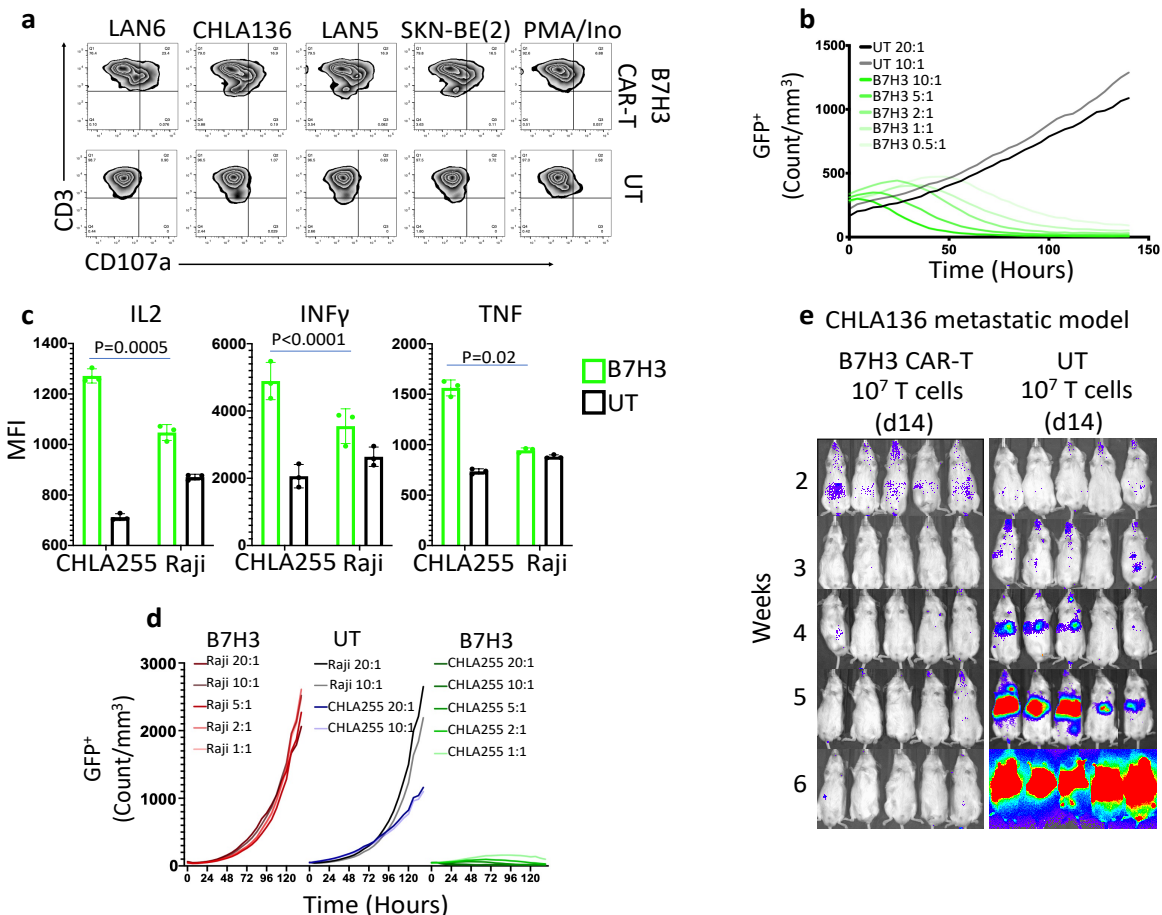

### Supplementary Figure 4. Anti-tumor efficacy of B7H3 CAR-T cells against a range of NBL cell lines. **a**

Enumeration by flow cytometry representing the expression of activation marker (CD107a) on transduced T cells

(CD3<sup>+</sup>) co-cultured with NBL cell lines for 4 hours. **b** Kinetics of cytotoxicity of UT and B7H3 CAR-T using live-cell imaging (enumeration of GFP<sup>+</sup> tumor cells) against B7H3<sup>+</sup> CHLA255 cell line at indicated E:T ratios. **c**

Summary of cytokine data as measured by flow cytometry. UT and B7H3 CAR-T co-cultured with B7H3<sup>+</sup> CHLA255

or B7H3<sup>-</sup> Raji cells at 1:1 E:T ratio for 24 hours. **d** Kinetics of cytotoxicity of UT and B7H3 CAR-T using live-cell imaging (enumeration of GFP<sup>+</sup> tumor cells) against B7H3<sup>+</sup> CHLA255 and B7H3<sup>-</sup> Raji cell lines at indicated E:T

ratios. **e** B7H3 CAR-T show *in vivo* efficacy against CHLA136 MYCN amplified NBL metastatic model.

Bioluminescence images of CHLA136 tumor growth upon intravenous (i.v.) injection of NSG mice (1 x 10<sup>6</sup>

cells/mouse) and treatment 14 days later with i.v. injection of 1x 10<sup>7</sup> B7H3 CAR-T cells or UT cells. Surviving mice

were followed for a minimum of 100 days post tumor inoculation. Data shown are representative of three independent experiments(**a,c**). mean for minimum of 4 replicate (**b, d**). mean±SD (c). Two-tailed t-test (c). n=5 mice (B7H3, UT).

Source data are provided as a Source Data file.



**Supplementary Figure 5.**

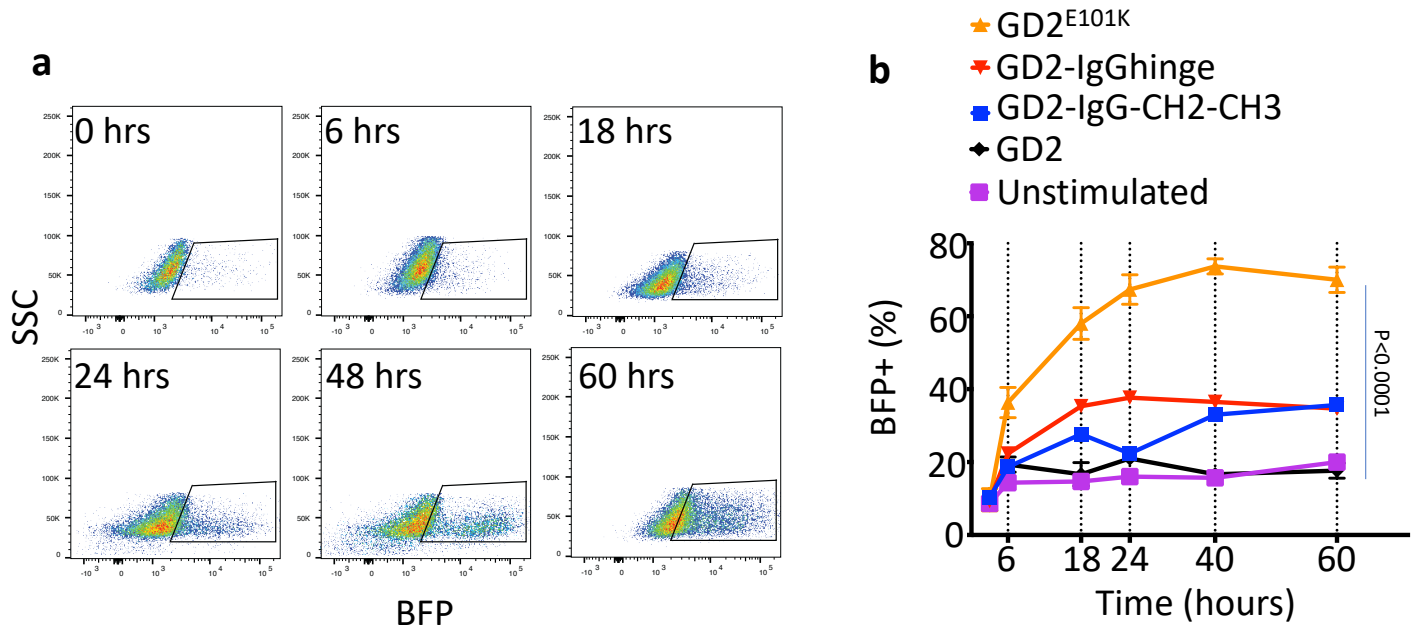

**Supplementary Figure 5. Kinetics of SynNotch activation with various gates. a** Representative dot plot of BFP expression by flow cytometry in GD2-BFP T cells co-cultured with NBL over a 3-day time course. **b** Time course kinetics of BFP expression by flow cytometry in GD2<sup>E101K</sup>-BFP, GD2<sup>WT</sup>-BFP, GD2<sup>IgGhinge</sup>-BFP, and GD2<sup>IgGCH2CH3</sup>-BFP T cells co-cultured with CHLA255 NBL cells for 3 days compared to unstimulated. Data shown are representative of three independent experiments (**a**, **b**). mean±SD (**b**). Two-tailed t-test (**b**)

**Supplementary Figure 6.**

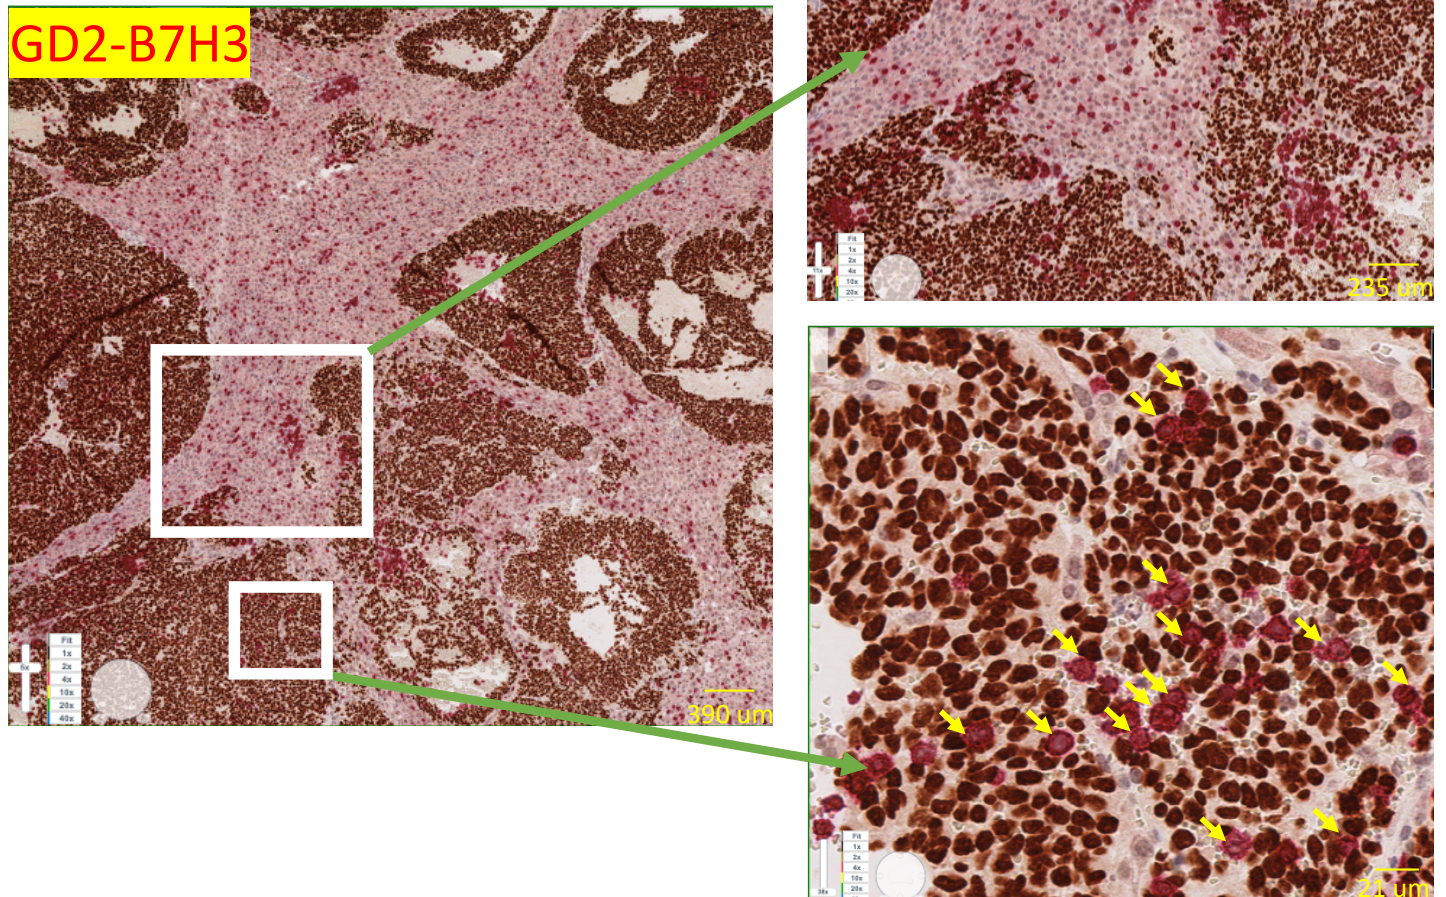

**Supplementary Figure 6. GD2-B7H3 T cells traffic and show evidence of cytotoxicity at metastatic NBL sites.**

Representative images from immunohistochemical analysis of tissue obtained from the liver of mice injected i.v. with CHLA255 NBL cells ( $1 \times 10^6$  cells/mouse) followed by i.v. injection of GD2-B7H3 T cells on day 28 (high disease burden). Tissues were obtained 7 days post T-cell injections and stained for NBL specific marker Phox2b (brown) and human CD3 (red). Despite mice not surviving at this stage with high disease burden, gated T cell infiltration and minimal tumor reduction were identified. Yellow arrows point to T cells. Data shown are representative of three mice.

## Supplementary Figure 7.

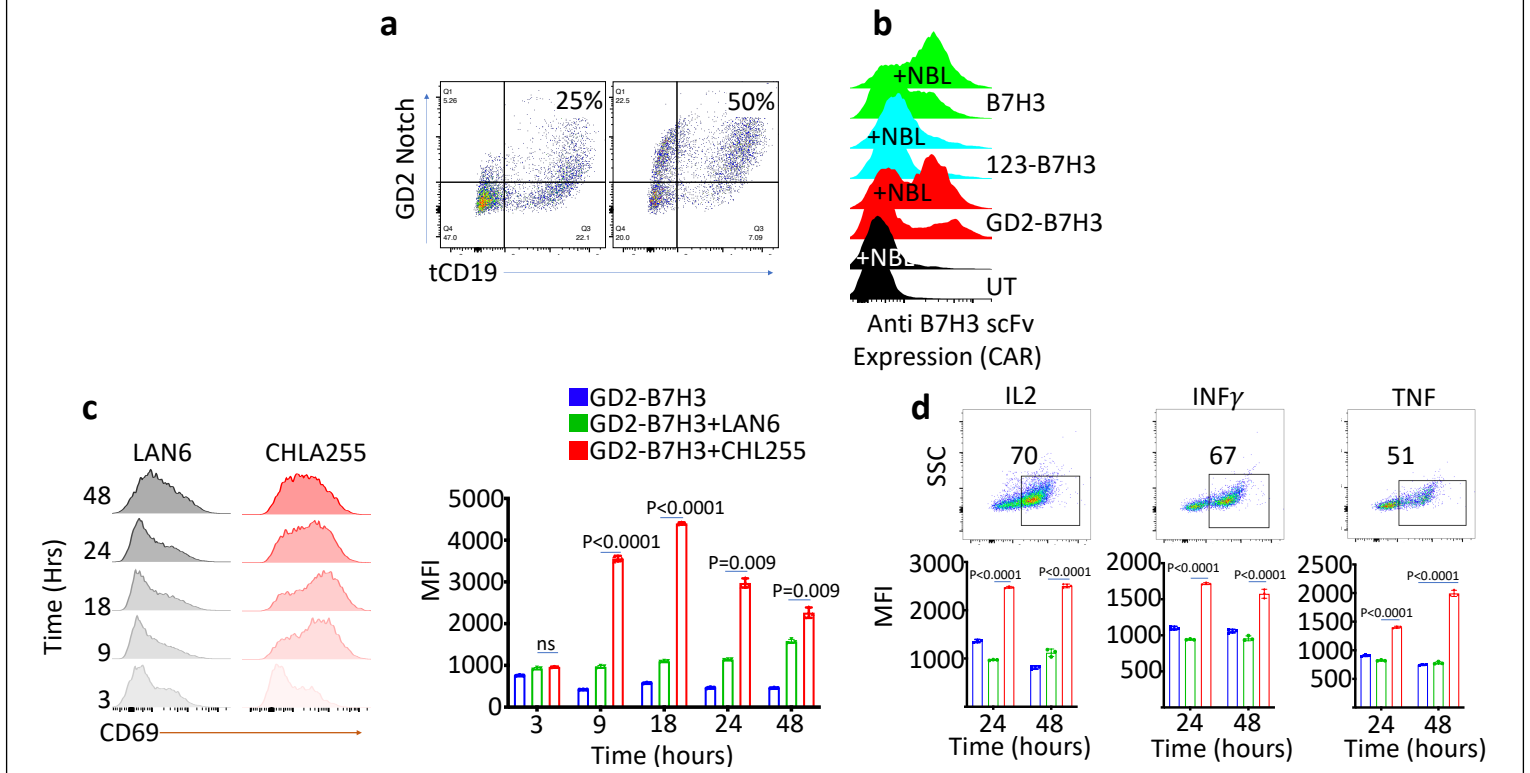

**Supplementary Figure 7. Enriched GD2-B7H3 T cells show *in vitro* specificity and efficacy.** **a** Representative dot plot of CD19 and GD2 SynNotch receptor expression in GD2-B7H3 T cells pre- and post-enrichment. **b** Histogram of B7H3 CAR expression as measured by flow cytometry analysis of conjugated B7H3 peptide binding on UT, B7H3 CAR-T, enriched GD2-B7H3, and CD123-B7H3 T cells with and without co-culturing CHLA255 NBL cells for 48 hours. **c** (Left) Representative histograms of early T cell activation marker (CD69) as measured by flow cytometry in enriched GD2-B7H3 T cells co-cultured with GD2<sup>+</sup> CHLA255 or GD2<sup>-</sup> LAN6 NBL cells at various time points as indicated. (Right) Summary of CD69 expression data measured by flow cytometry including unstimulated GD2-B7H3 T cells. **d** (Top) representative dot plots of intracellular cytokines IL2, IFN $\gamma$ , and TNF in enriched GD2-B7H3 T cells co-cultured with CHLA255 NBL cells for 48 hours. (Bottom) Summary of cytokine expression as measured by flow cytometry for enriched GD2-B7H3 T cells co-cultured with GD2<sup>+</sup> CHLA255 or GD2<sup>-</sup> LAN6 NBL cells and unstimulated at 24 and 48 hours. Data shown are representative of three independent experiments (**a-d**). mean $\pm$ SD (**c,d**). Two-tailed t-test (**c, d**). Source data are provided as a Source Data file



Supplementary Figure 8.

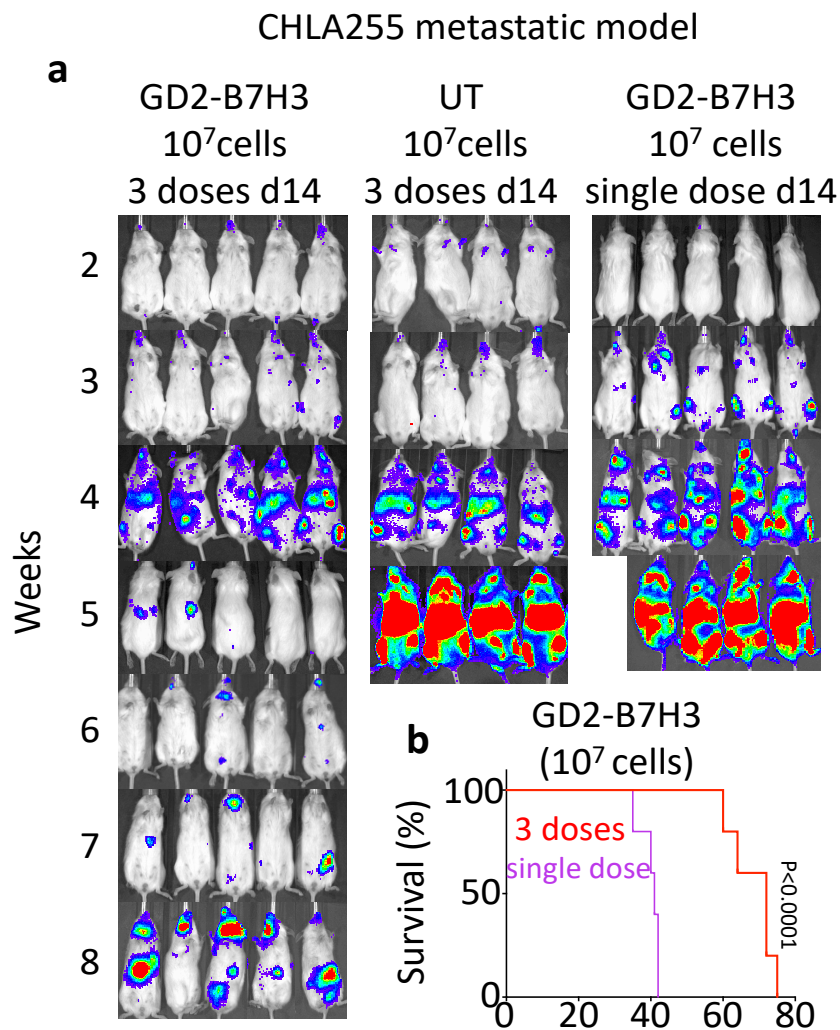

**Supplementary Figure 8. a GD2-B7H3 T cell reinfusion improves efficacy with no toxicity. a** Bioluminescence images of tumor growth in NSG mice after i.v. injection of CHLA255 NBL cells ( $1 \times 10^6$  cells/mouse) and treatment 14 days later with three doses of i.v. injection of UT or enriched GD2-B7H3 T cells ( $1 \times 10^7$  cells/mouse/injection) versus one-time i.v. injection of GD2-B7H3 T cells. **b** Kaplan–Meier survival graph representing mice received 3 doses versus a single-dose i.v. injection of  $1 \times 10^7$  of GD2-B7H3 T cells on day 14 post tumor inoculation.  $n=5$  mice (B7H3, GD2-B7H3 X3 dose) and  $n=4$  (UT), no experimental mice excluded. Gehan-Breslow-Wilcoxon test (**b**).



## Supplementary Figure 9.

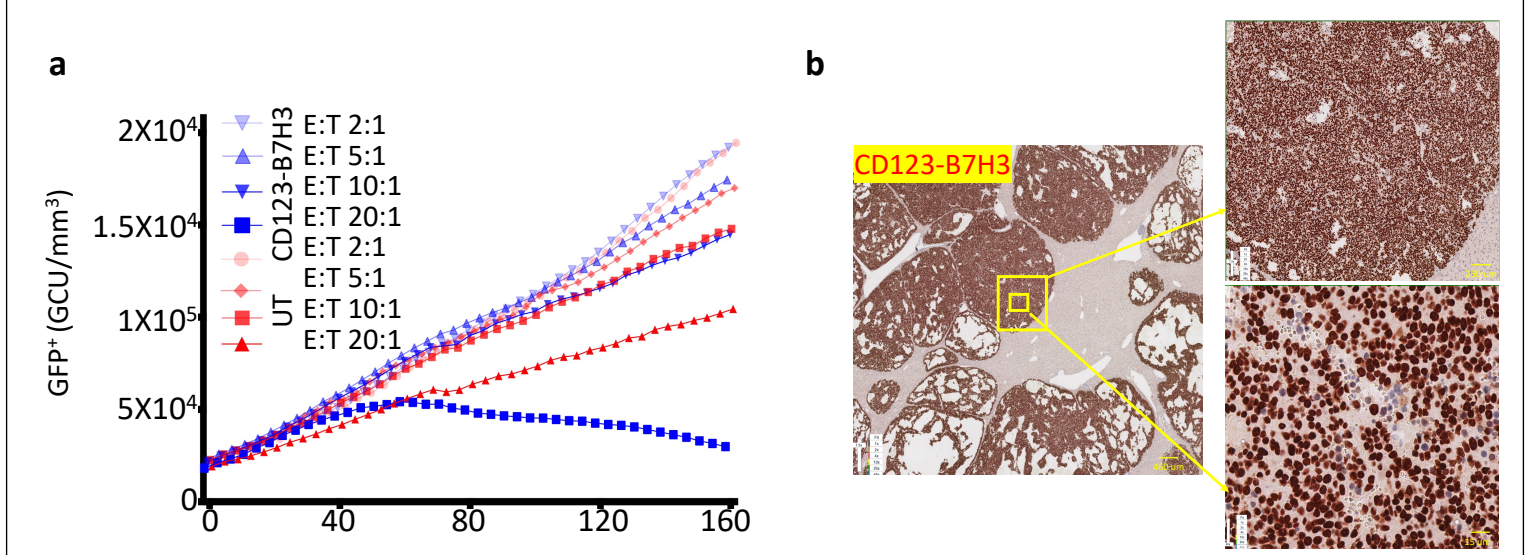

**Supplementary Figure 9. Leaky expression of B7H3 CAR in the gated system is functionally negligible. a** Kinetics of cytotoxicity of UT and CD123-B7H3 T cells using live-cell imaging (enumeration of GFP+ tumor cells) against CHLA255 NBL cells at indicated E:T ratios (minimum of 4 replicates). **b** Representative 1.5 X (Left), 10 X (Right upper), and 40 X (Right lower) images from immunohistochemical analysis of tissue obtained from the liver of mice injected i.v. with CHLA255 NBL cells ( $1 \times 10^6$  cells/mouse) followed by i.v. injection of  $1 \times 10^7$  CD123-B7H3 T cells per mouse on day 28 (high disease burden). Tissues were obtained 7 days post T-cell injections and stained for NBL specific marker Phox2b (brown) and human CD3 (red). CD123-B7H3 control gated T cell did not traffic to the tumor site. Mean for minimum of 4 replicate (**a**). n=2 mice (CD123-B7H3). source data are provided as a Source Data file.

**Supplementary Figure 10.**

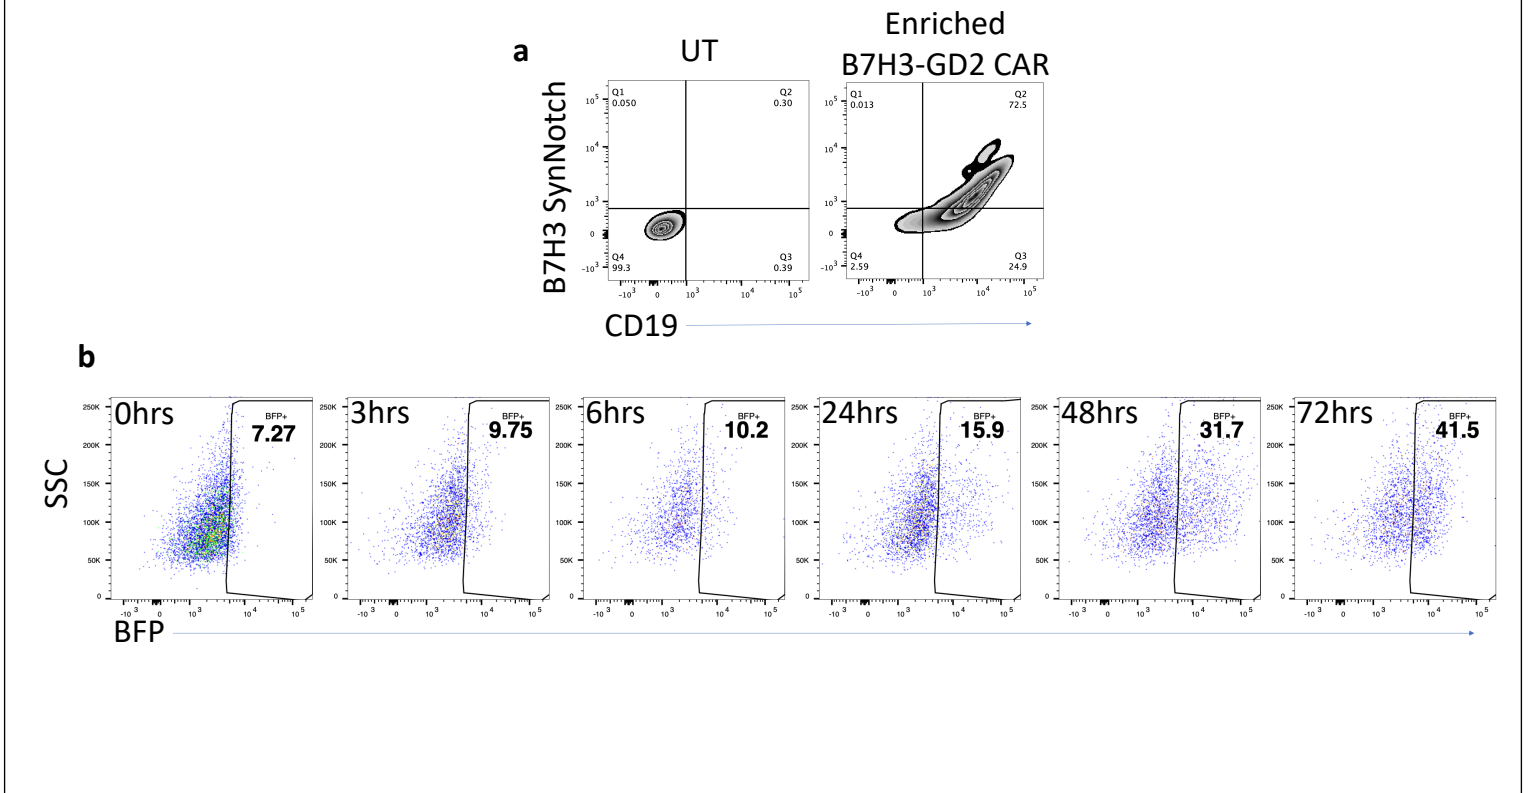

**Supplementary Figure 10. Enriched B7H3-GD2 system is functional in vitro.** **a** Contour plot representing the expression of SynNotch B7H3 gate and truncated CD19 by flow cytometry of untransduced (UT) and B7H3-GD2 transduced CAR T cells. **b** Representative dot plots of BFP expression measured by flow cytometry at indicated time points in B7H3-BFP T cells co-cultured with CHLA 255 NBL cells over a 3-day time course. Data shown are representative of three independent experiments (**a**, **b**).

**Supplementary Figure 11.**

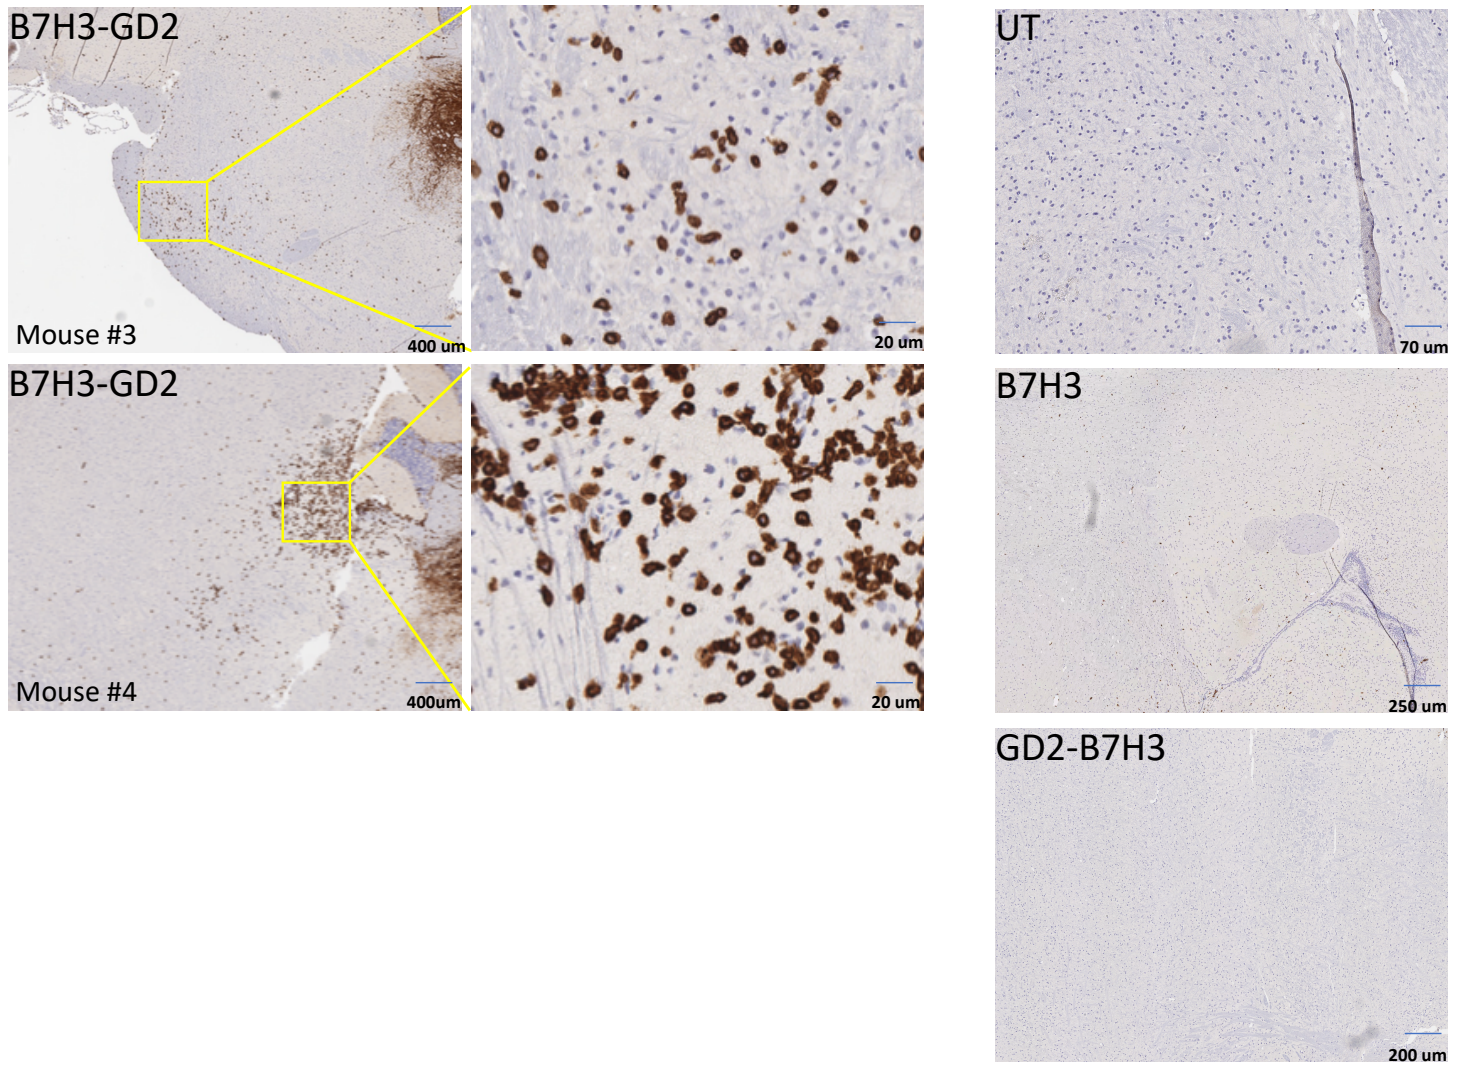

**Supplementary Figure 11.** Additional immunohistochemical analysis of CD3 expression (brown staining) in the brain of mice treated with B7H3-GD2 T cells, UT, B7H3, and GD2-B7H3 CAR-T cells. Data shown are representative of the additional images from mice in Fig. 7e, no live animal was excluded.

Supplementary Figure 12.

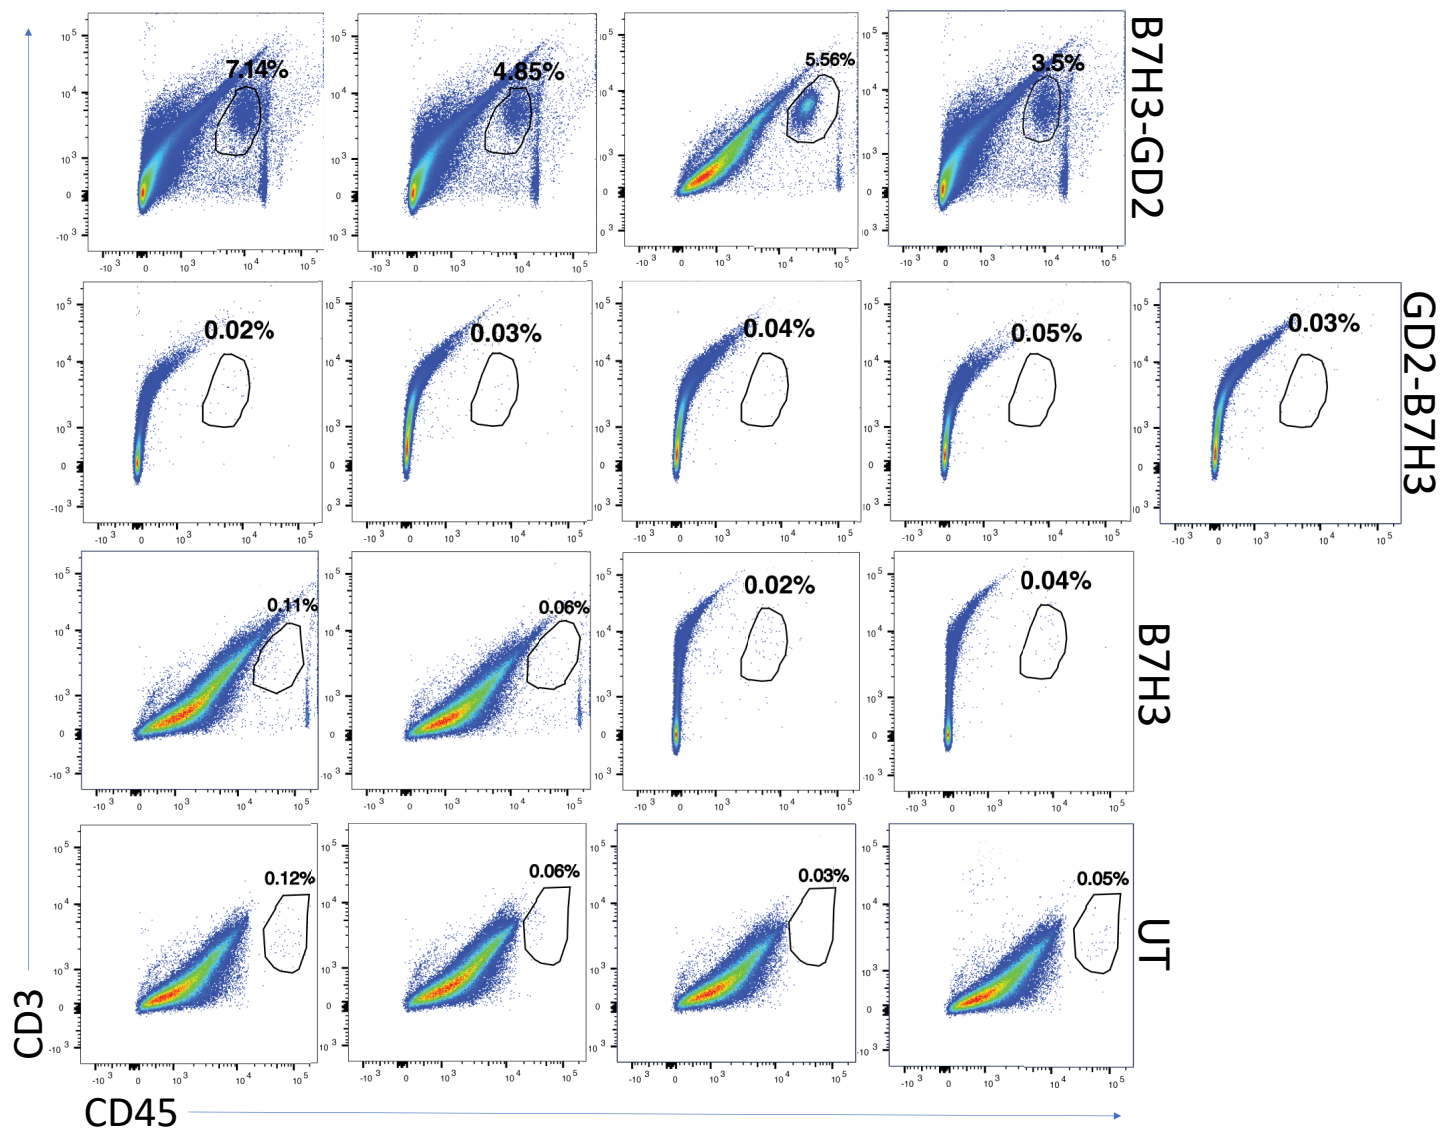

Supplementary Figure 12. Additional flow cytometry plots for CD45 and CD3 expression in single cells dissociated from brain tissue of animals treated with B7H3-GD2, GD2-B7H3, B7H3 CAR-T cells, and untransduced (UT) cells. no animal was excluded.



Supplementary Figure 13.

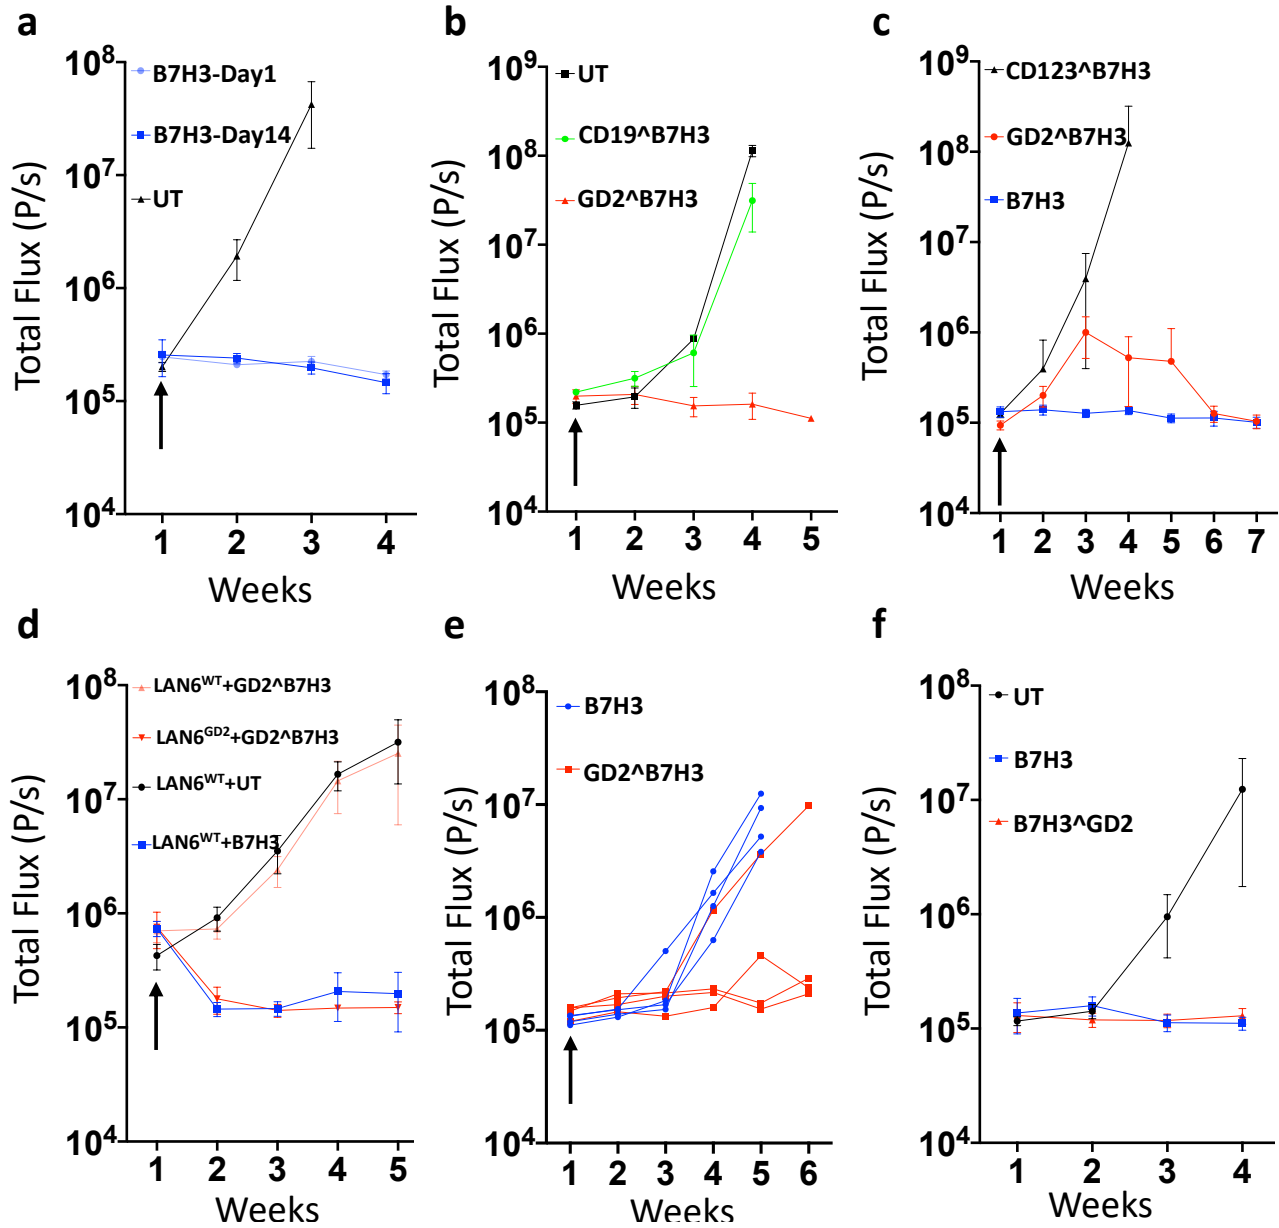

Supplementary Figure 13. Summary data representation of bioluminescence intensity in the main figures. **a-f** represent Figures 3g, 4j, 5g, 5f, 6g, 7d.

### Supplementary Figure 14.

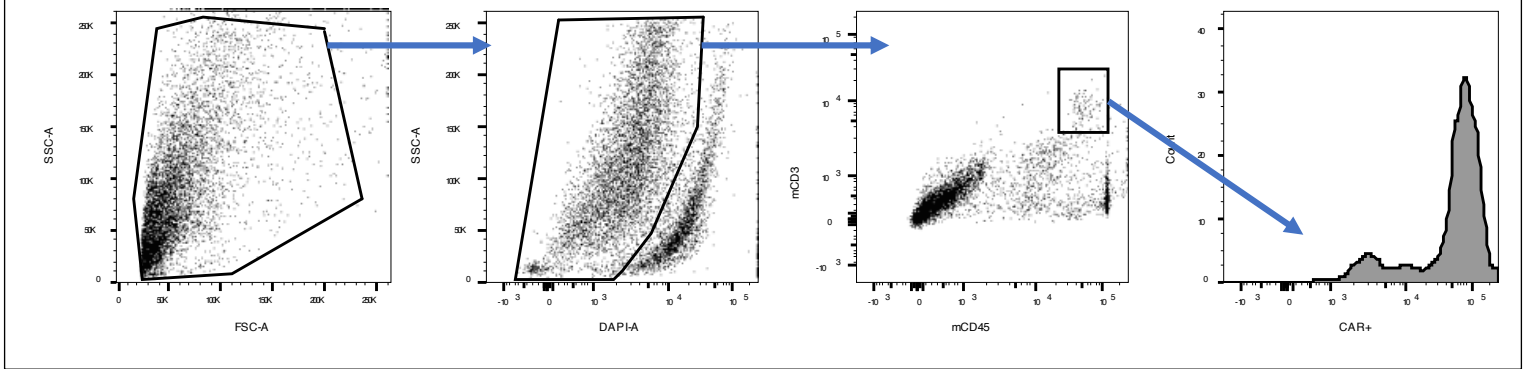

**Supplementary Figure 14.** Gating strategy to identify murine CAR-T cells in homogenized mice brain in Fig. 1(b). total live cells by DAPI were gated for mCD3 and mCD45. Fab<sup>+</sup> CAR T cells were detected among double positive mouse T cells.

### Supplementary Figure 15.

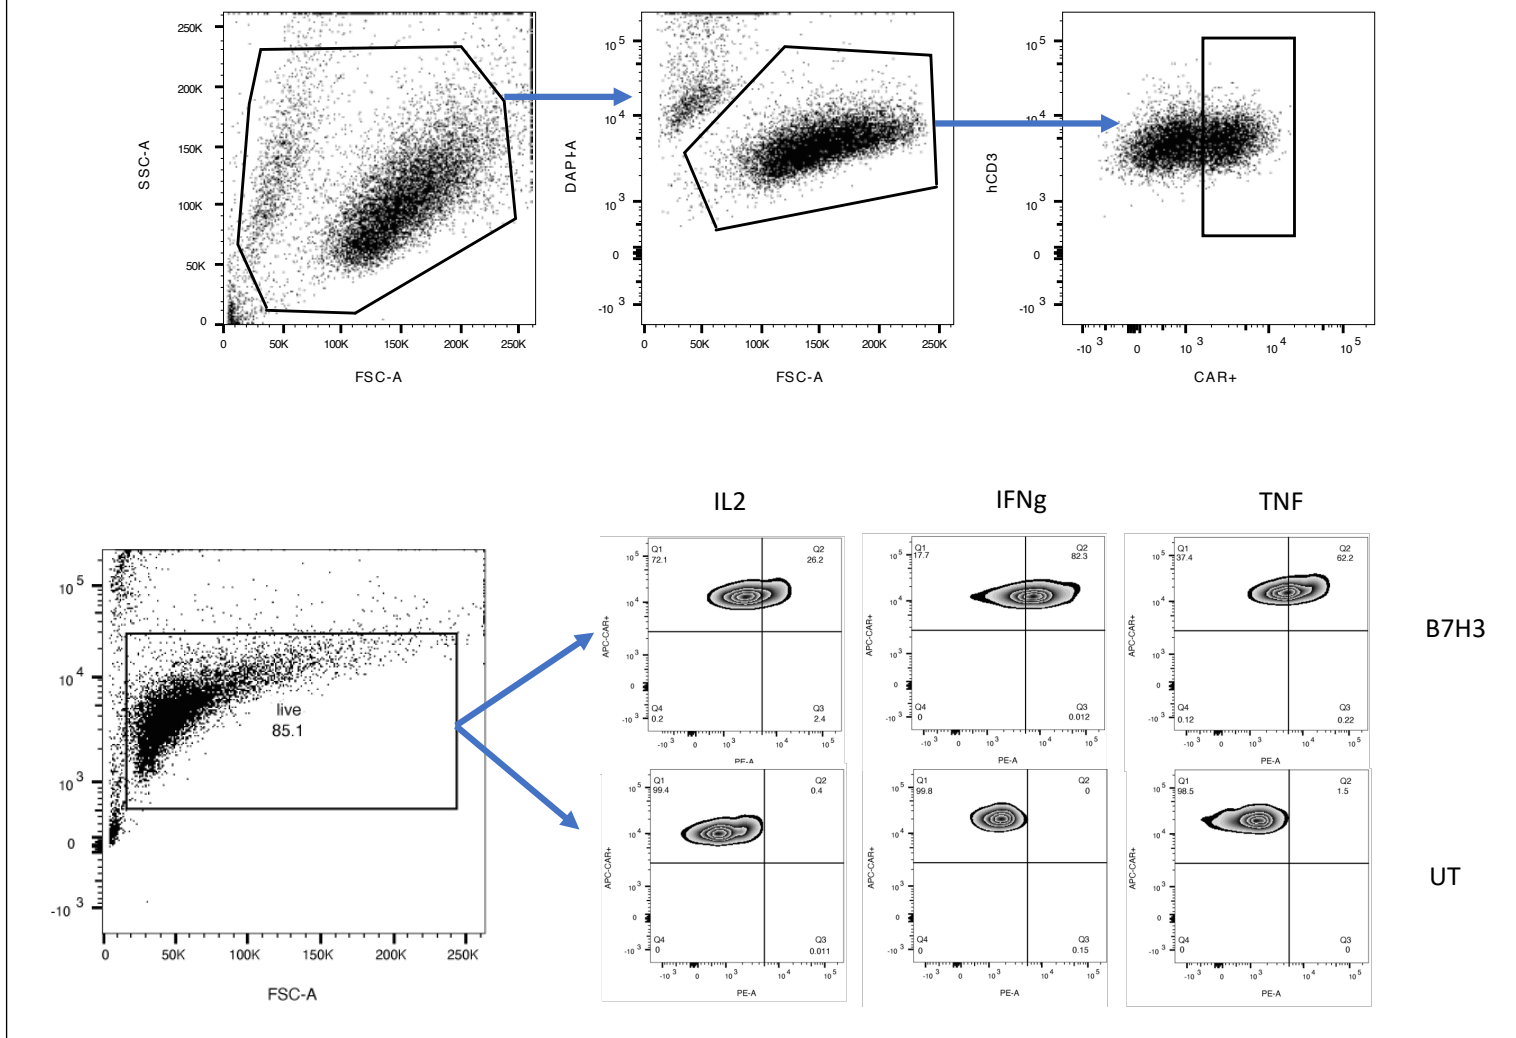

**Supplementary Figure 15.** Gating strategy to identify human CAR-T cells in Fig. 3 (b,c). **a** Total live cell by DAPI were gated for hCD3 and fab<sup>+</sup> CAR T cells. **b** Total live cells by fixable zombie uv were gated for APC-fab<sup>+</sup> CAR surface marker and intracellular cytokine in PE channel.

### Supplementary Figure 16.

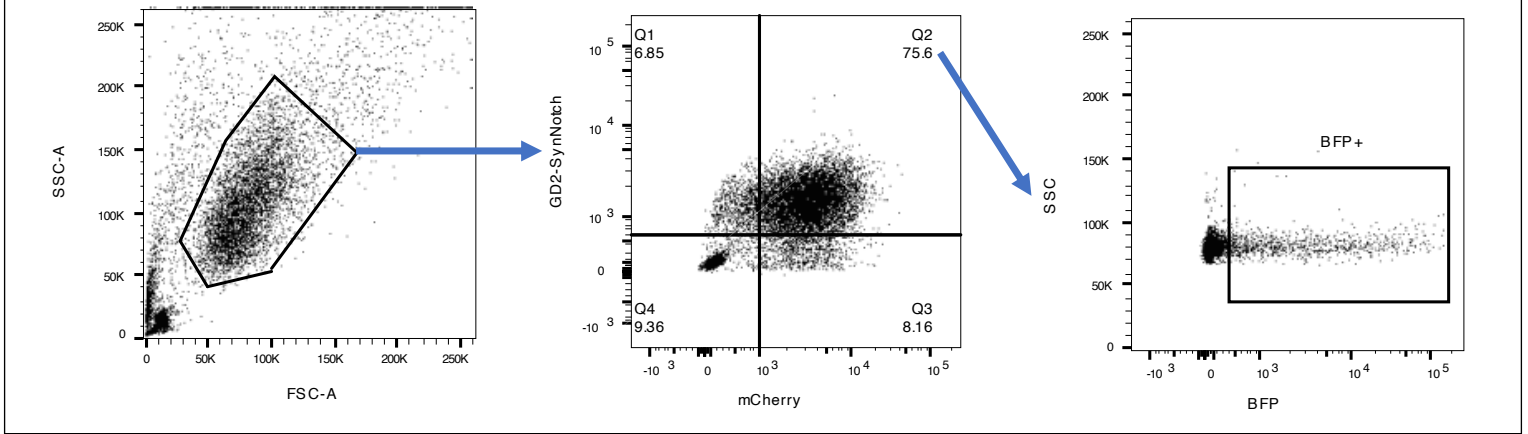

**Supplementary Figure 16.** Gating strategy to identify BFP expression in gated CAR-T cells. **a** Total cells were gated for SynNotch and mcherry expression (respond construct). Followed by BFP expression in double positive gate.



### Supplementary Figure 17.

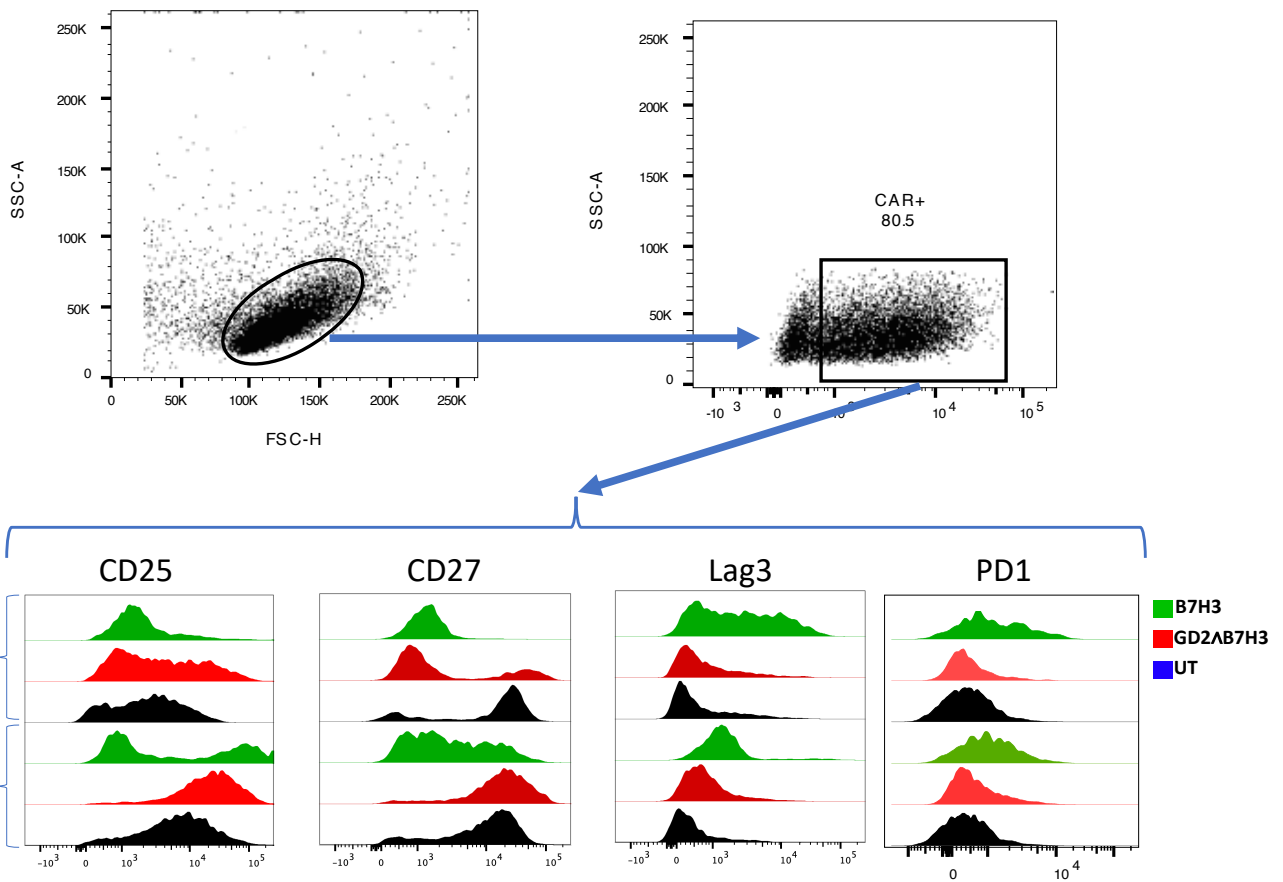

**Supplementary Figure 17.** Gating strategy to identify expression of the exhaustion marker in Fig. 5 (a,b,f). Total cells were gated for CAR expression followed by individual expression of the markers measured in histogram.

**Supplementary Figure 18.**

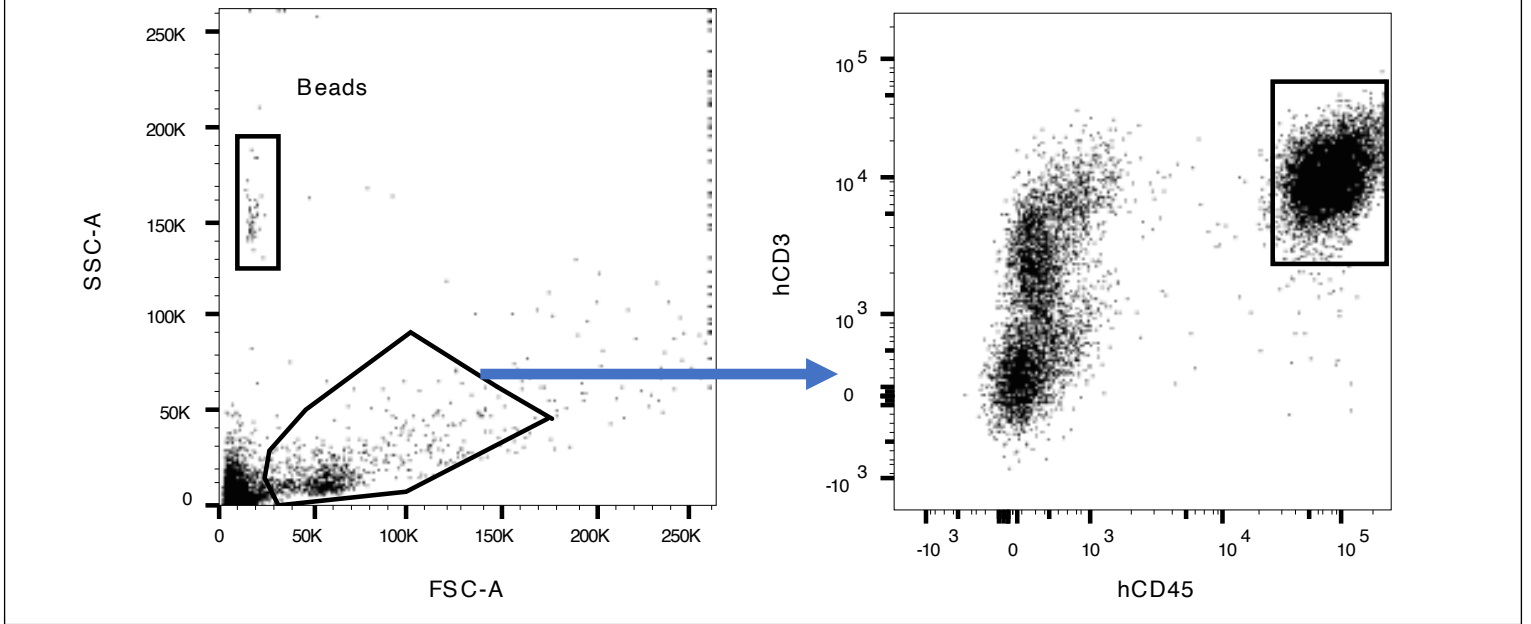

**Supplementary Figure 18.** Gating strategy to determine the human T cell count in mouse blood Fig. 5(h), 6(h) and 7(f). Total cells were gated for human CD3 and CD45 expression. Absolute T cell count/mm<sup>3</sup> was measured as T cell count/Beads \*200.

**Supplementary Table 1. List of reagents and antibodies**

| Reagent Type                                                                                 | Source/Sequence                       | Cat#                                   | dilution |
|----------------------------------------------------------------------------------------------|---------------------------------------|----------------------------------------|----------|
| <b>Antibodies</b>                                                                            |                                       |                                        |          |
| AffiniPure F(ab') <sub>2</sub> Fragment Goat Anti-Mouse IgG, F(ab') <sub>2</sub> fragment sp | jackson immuno                        | cat#115-006-072                        | 200      |
| AffiniPure F(ab') <sub>2</sub> Fragment Goat Anti-Mouse IgG, F(ab') <sub>2</sub> fragment sp | jackson immuno                        | cat#115-006-072                        | 200      |
| AffiniPure F(ab') <sub>2</sub> Fragment Goat Anti-Mouse IgG, F(ab') <sub>2</sub> fragment sp | jackson immuno                        | cat#115-006-072                        | 200      |
| Pierce™ Recombinant Protein L, Biotinylated                                                  | Theromfisher                          | cat#29997                              | 200      |
| APC Streptavidin                                                                             | Biolegend                             | cat#405243                             | 200      |
| PE anti-human IL-2                                                                           | Biolegend                             | cat#500306                             | 200      |
| PE anti-human IFN-γ                                                                          | Biolegend                             | cat#502508                             | 200      |
| PE anti-human TNF-α                                                                          | Biolegend                             | cat#502908                             | 200      |
| FITC anti-human CD3                                                                          | Biolegend                             | cat#317305                             | 400      |
| Brilliant Violet 421™ anti-human CD45                                                        | Biolegend                             | cat#368521                             | 200      |
| PE anti-human CD107a                                                                         | Biolegend                             | cat#328607                             | 200      |
| PE anti-human CD279 (PD-1)                                                                   | Biolegend                             | cat#329905                             | 200      |
| PE anti-human CD223 (LAG-3)                                                                  | Biolegend                             | cat#369305                             | 200      |
| PE anti-human CD25                                                                           | Biolegend                             | cat#302605                             | 200      |
| PE anti-human CD27                                                                           | Biolegend                             | cat#356405                             | 200      |
| PE anti-human CD19                                                                           | Biolegend                             | cat#392505                             | 200      |
| PE anti-human CD69                                                                           | Biolegend                             | cat#310905                             | 200      |
| PE anti-human Ganglioside GD2                                                                | Biolegend                             | cat#357303                             | 200      |
| PE anti-human CD276 (B7-H3)                                                                  | Biolegend                             | cat#331605                             | 200      |
| anti human CD3e Monoclonal                                                                   | eBioscience                           | cat#14-0031-82                         | 500      |
| anti human PHOX2B Polyclonal                                                                 | eBioscience                           | cat#PA5-35044                          | 500      |
| FITC anti-mouse CD3e                                                                         | Biolegend                             | cat#100305                             | 400      |
| Brilliant Violet 421™ anti-mouse CD45                                                        | Biolegend                             | cat#103133                             | 400      |
| PE anti-mouse CD107a                                                                         | Biolegend                             | cat#121611                             | 200      |
| PE anti-mouse INFg                                                                           | Biolegend                             | cat#505807                             | 200      |
|                                                                                              |                                       |                                        |          |
| CFSE Cell Division Tracker Kit                                                               | Biolegend                             | cat#423801                             |          |
| Recombinant Human B7-H3 (4Ig)/B7-H3b Protein                                                 | R&D systems                           | cat#2318-B3-050                        |          |
|                                                                                              |                                       |                                        |          |
| <b>Critical Commercial Assays</b>                                                            |                                       |                                        |          |
| EasySep Human naive T Cell Isolation Kit                                                     | Stem Cell Technologies                | Cat# 17951                             |          |
| RNeasy Micro kit                                                                             | QIAGEN                                | Cat# 74004                             |          |
| MojoSort™ Mouse anti-PE Nanobeads                                                            | biolegend                             | Cat# 480079                            |          |
| MojoSort™ Mouse CD45 Nanobeads                                                               | biolegend                             | Cat# 480027                            |          |
| PE / R-Phycoerythrin Conjugation Ki                                                          | abcam                                 | cat#ab102918                           |          |
| MycoAlert™ Mycoplasma Detection Kit                                                          | lonza                                 | cat#LT07-31                            |          |
| BD Quantibrite™ Beads                                                                        | BD                                    | cat#340495                             |          |
| Seahorse XF Cell Mito Stress Test Kit                                                        | Agilent                               | cat#103015-100                         |          |
| Mouse T-Activator CD3/28 Dynabeads                                                           | Thermo Fisher Scientific              | Cat# 11452D                            |          |
| Human T-Activator CD3/28 Dynabeads                                                           | Thermo Fisher Scientific              | Cat# 11132D                            |          |
| Retronectin                                                                                  | Takara                                | Cat# T202                              |          |
|                                                                                              |                                       |                                        |          |
| <b>Cell lines</b>                                                                            |                                       |                                        |          |
| CHLA255                                                                                      |                                       |                                        |          |
| LAN1                                                                                         |                                       |                                        |          |
| LAN6                                                                                         |                                       |                                        |          |
| CLHA136                                                                                      |                                       |                                        |          |
| CHLA51                                                                                       |                                       |                                        |          |
| SK.N.BE                                                                                      |                                       |                                        |          |
| SMS-SAN                                                                                      |                                       |                                        |          |
| 293T                                                                                         |                                       |                                        |          |
| jurkat                                                                                       |                                       |                                        |          |
| ECO-phoenix                                                                                  |                                       |                                        |          |
| Raji                                                                                         |                                       |                                        |          |
| NBL9464                                                                                      |                                       |                                        |          |
|                                                                                              |                                       |                                        |          |
| <b>Experimental Models: Organisms/Strains</b>                                                |                                       |                                        |          |
| Mouse: C57BL/6 (B6): C57BL/6J                                                                | The Jackson Laboratory stock # 000664 | Cat# JAX:000664; RRID: IMSR_JAX:00066  |          |
| Mouse: NOD/SCID/γc-/- (NSG): NOD.Cg-PrkdcscidIl2rgtm1Wjl/SzJ                                 | The Jackson Laboratory stock # 005557 | Cat# JAX:005557; RRID: IMSR_JAX:005557 |          |

**Supplementary Table 2.** Protein sequences of the constructs

| Peptides, and Recombinant Proteins |                                                                                                                                                                                                                                                                                                                                                                                                                                                                                                                                                                                                                                                                                                                                                                                                                                                                                                                                                                                                                                                |
|------------------------------------|------------------------------------------------------------------------------------------------------------------------------------------------------------------------------------------------------------------------------------------------------------------------------------------------------------------------------------------------------------------------------------------------------------------------------------------------------------------------------------------------------------------------------------------------------------------------------------------------------------------------------------------------------------------------------------------------------------------------------------------------------------------------------------------------------------------------------------------------------------------------------------------------------------------------------------------------------------------------------------------------------------------------------------------------|
| CD8 leader                         | MALPVTALLPLALLLHAARP                                                                                                                                                                                                                                                                                                                                                                                                                                                                                                                                                                                                                                                                                                                                                                                                                                                                                                                                                                                                                           |
| CD8 transmembrane                  | IYIWAPLAGTCGVLLLSLVLITLYC                                                                                                                                                                                                                                                                                                                                                                                                                                                                                                                                                                                                                                                                                                                                                                                                                                                                                                                                                                                                                      |
| 4-1BB                              | KRGRKKLLYIFKQPFMRPVQTTQEEDGCSCRFPEEEEGGCEL                                                                                                                                                                                                                                                                                                                                                                                                                                                                                                                                                                                                                                                                                                                                                                                                                                                                                                                                                                                                     |
| CD3z                               | RVKFSRSADAPAYKQGQNQLYNELNLGRREYDVLDKRRGRDPEMGGKPRRKNPQEGLYNELQDKMAEAYSEIGMKGERRR<br>GKGHDGLYQGLSTATKDTYDALHMQALPPR                                                                                                                                                                                                                                                                                                                                                                                                                                                                                                                                                                                                                                                                                                                                                                                                                                                                                                                             |
| GD2 HC                             | EVKLQQSGPSLVEPGASVMISCKASGSSFTGYNMNWWVRQNIKGSLEWIGAIDPYGGTSYNQKFKGRATLTVDKSSSTAYMHLKS<br>LTSEDSAVYYCVSGMEYWGQGTSTVSSAKTTPPSVY                                                                                                                                                                                                                                                                                                                                                                                                                                                                                                                                                                                                                                                                                                                                                                                                                                                                                                                  |
| GD2 HC E101K                       | EVKLQQSGPSLVEPGASVMISCKASGSSFTGYNMNWWVRQNIKGSLEWIGAIDPYGGTSYNQKFKGRATLTVDKSSSTAYMHLKS<br>LTSEDSAVYYCVSGMKYWGQGTSTVSSAKTTPPSVY                                                                                                                                                                                                                                                                                                                                                                                                                                                                                                                                                                                                                                                                                                                                                                                                                                                                                                                  |
| GD2 LC                             | DILLTQTPLSLPVSLGDAQSISCRSSQSLVHRNGNTYLHWYLQKPGQSPKLLIHKVSNRFSGVPDRFSGSGSGTDFTLKISRVEAEDL<br>GVYFCSQSTHVPPLTFGAGTKLELRADAAPTVISIFP                                                                                                                                                                                                                                                                                                                                                                                                                                                                                                                                                                                                                                                                                                                                                                                                                                                                                                              |
| anti CD123 HC                      | QIQLVQSGPELKKPGETVKISCKASGYIFTNYGMNWWKQAPGKSKFWMGWINTYTGESTYSADFKGRFAFSLETSASTAYLHINDL<br>KNEDTATYFCARSGGYDPMDYWGQGTSTVSS                                                                                                                                                                                                                                                                                                                                                                                                                                                                                                                                                                                                                                                                                                                                                                                                                                                                                                                      |
| anti CD123 LC                      | DIVLTQSPASLAVSLGQRATISCRASESDVNYGNTFMHWYQQKPGQPPKLLIYRASNLESGIPARFSGSGSRTDFTLTINPVEADDV<br>ATYYCQQSNEDPPTFGAGTKLELK                                                                                                                                                                                                                                                                                                                                                                                                                                                                                                                                                                                                                                                                                                                                                                                                                                                                                                                            |
| anti B7H3 HC                       | DVQLVESGGGLVQPGGSRKLSCAASGFTFSSFGMHVWRQAPKGLVWVAYISSDSSAIYYADTVKGRFTISRDNPKNTLFLQMTS<br>LRSEDTAMYYCGRGENIYYGSRLDYWGQGTTLTVSS                                                                                                                                                                                                                                                                                                                                                                                                                                                                                                                                                                                                                                                                                                                                                                                                                                                                                                                   |
| anti B7H3 LC                       | DIAMTQSQKFMSTSVGDRVSVTCKASQNVDTNVAWYQQKPGQSPKALIYSASYRYSVGPDRFTGSGSGTDFTLTINNVQSEDLA<br>EYFCQQYNNYPFTFGSGTKLEIK                                                                                                                                                                                                                                                                                                                                                                                                                                                                                                                                                                                                                                                                                                                                                                                                                                                                                                                                |
| CH2CH3                             | PPSVYESKYGPPCSPCAPEFEGGPSVFLFPPKPKDTLMISRTPEVTCVVDVVSQEDPEVQFNWYVDGVEVHNAKTKPREEQFQST<br>YRVVSVLTVLHQDWLNGKEYKCKVSNKGLPSSIEKTIKAKGQPREPQVYTLPPSQEEMTKNQVSLTCLVKGFYPSDIAVEWESNG<br>QPENNYKTTTPVLDSDGSFFLYSRLTVDKSRWQEGNVFSCVMHEALHNHYTQKSLSLGLKILDYS                                                                                                                                                                                                                                                                                                                                                                                                                                                                                                                                                                                                                                                                                                                                                                                            |
| IgG4 hinge                         | EPKSCDKTHTCP                                                                                                                                                                                                                                                                                                                                                                                                                                                                                                                                                                                                                                                                                                                                                                                                                                                                                                                                                                                                                                   |
| tCD19                              | MPPPRLLFFLLFLTPMEVRPEEPLVVKVEEGDNAVLQCLKGTSDGPTQQLTWSRESPLKPKFLKSLGLPLGLIHMRLAIWLFIFNV<br>SQQMGGFYLCQPGPPSEKAWQPGWTVNVEGSGELFRWNVSDLGLGCLKNRSSEGPSSPSGKLMSPKLYVWAKDRPEIWEW<br>EPPCLPPRDSLNLQSLSDLTMAPGSTLWLSGCVPPDSVSRGPLSWTHVHPKGPKSLSLELKDDRPARDMWWMETGLLPRATA<br>QDAGKYYCHRGNTMSFHLEITARPVLWHWLLRTGGWVSAVTLAYLIFCLCSLVGILHLQRALVLRKRKRMTDPTRRFFKVTP<br>PPGSGPQNQYGNVLSLPTPTSGLGRAQRWAAGLGGTAPSYGNPSSDVQADGALGSRSPGVPGEIEGEGYEPDSEEDSEFYE<br>NDSNLGQDQLSQDGSYENPEDEPLGPEDEDSFSNAESYENEDEELTQPVARTMDFLSPHGSWDPREATSLGSQSYEDMRG<br>ILYAAPQLRSIRGQPGPNHEEDADSYENMDNPDGPDPAWGGGGRMGTWSTR*                                                                                                                                                                                                                                                                                                                                                                                                                                                        |
| mCD28                              | IEFMYPYLDNERSNGTIIHIKEKHLCHTQSSPKLFWALVVVAGVLCYGLLTVVALCVIWTNSRRNRGGQSDYMNMTPRRPGL<br>TRKPYQPYAPARDFAAAYRP                                                                                                                                                                                                                                                                                                                                                                                                                                                                                                                                                                                                                                                                                                                                                                                                                                                                                                                                     |
| mCD3                               | RAKFSRSAETAANLQDPNQLFNLNLGRREFDVLEKRRARDPEMGGKQQRNRNPQEGVYNALQDKMAEAYSEIGTKGERRR<br>GKGHDGLFQGLSTATKDTFDALHMQTLAPR                                                                                                                                                                                                                                                                                                                                                                                                                                                                                                                                                                                                                                                                                                                                                                                                                                                                                                                             |
| mCD8                               | SSVVPVLQKVNSTTTKPVLRTPSPVHPTGTSQPQRPEDCRPRGSVKGTGLDFACDIYIWAPLAGICVALLLSLIITLI                                                                                                                                                                                                                                                                                                                                                                                                                                                                                                                                                                                                                                                                                                                                                                                                                                                                                                                                                                 |
| m4-1BB                             | SVLKWIRKKFPHIFKQPFKKTGAAQEEDACSCRCPEEEEGGGGYEL                                                                                                                                                                                                                                                                                                                                                                                                                                                                                                                                                                                                                                                                                                                                                                                                                                                                                                                                                                                                 |
| GD2-T2A-GD3 synthase               | MEAGRPLGQRPIAALLRFLGSEAGKWVRGRAQGRAQGRGGRPKVLRPGLHASKAHVCRAVLLFLISGPFESRVKWSKAG<br>GQWIMSPCGRARRQTSRGAMAVLAWKFRTRRLPMGASALCVVLCWLYIFPVYRLPNEKEIVQGVLQQGTAWRRNQTAARAF<br>RKQMEDCCDPAHLFAMTKMNSPMGKSMWYDGEFLYSFTIDNSTYSLFPQATPFQLPKKCAVVGNGGILKSGCGRQIDEANF<br>VMRCNLPPLSSEYTKDVGSKSQLVTANPSIIRQRFQNLWSRKTVDNMKIYNHSYIYMPAFSMKTGTEPSLRVYYTLDVGANQ<br>TVLFANPNFLRSIGKFWKSRGIHAKRLSTGLFLVSAALGLCEEVAIYGFWPFVNMHEQPISSHYYDNVLPFSGFHAMPEEFLQLW<br>YLHKIGALRMQLDPCEDTSLQPTSGSGEGRGSLLTCGDVEENPGPMWLGRRALCALVLLACASGLLYASTRDAPGLRLPLAPW<br>APPQSPRRPELPLAPEPRYAHIPVRIKEQVVGLLAWNNCSCESSGGGLPLPFQKQVRAIDLTKAFDPAELRAASATREQEQAFLS<br>RSQSPADQLLIAPANSPLOPLQGVVQLRSILVPLGSLQAASGQEVYQVNLASLGTWDVAGEVTGVTLTGEGQADTLVSPG<br>LDQLNRQLQLVYSSRSYQNTADTVRFSTEGHEAAFTIRIRHPPNRLYPPGSLPQGAQYNISALVTIATKFLRYDRLRALITSIRR<br>FYPTVTVVIADSDKPERVSGPYVEHYLMPFGKWFAGRNLAWSQVTTKYVLWDDDFVFTARTLERLVDLERTPLDLVGGGA<br>VREISGFATTYRQLLSVEPGAPGLGNCLRQRGFHHELVGFGCVVTDGVVNFFLARTDKVREVGFDPRLSRVAHLEFFLDGLGS<br>LRVGCSDVVVDHASKLKLWTSRDAEYARYRYPGSLDESQMAKHRLFFKHRLQCMTSQ* |
