# Supplementary material for: Preclinical assessment of the efficacy and specificity of GD2-B7H3 SynNotch CAR-T in metastatic neuroblastoma
Source: PubMed Central journal article supplement (PMC7820416; doi:10.1038/s41467-020-20785-x), 2021-01-21
Supplement: 41467_2020_20785_MOESM3_ESM.pdf [file 41467_2020_20785_MOESM3_ESM.pdf]

## Reporting Summary

Nature Research wishes to improve the reproducibility of the work that we publish. This form provides structure for consistency and transparency in reporting. For further information on Nature Research policies, see our [Editorial Policies](#) and the [Editorial Policy Checklist](#).

### Statistics

For all statistical analyses, confirm that the following items are present in the figure legend, table legend, main text, or Methods section.

n/a Confirmed

- The exact sample size ( $n$ ) for each experimental group/condition, given as a discrete number and unit of measurement
- A statement on whether measurements were taken from distinct samples or whether the same sample was measured repeatedly
- The statistical test(s) used AND whether they are one- or two-sided  
*Only common tests should be described solely by name; describe more complex techniques in the Methods section.*
- A description of all covariates tested
- A description of any assumptions or corrections, such as tests of normality and adjustment for multiple comparisons
- A full description of the statistical parameters including central tendency (e.g. means) or other basic estimates (e.g. regression coefficient) AND variation (e.g. standard deviation) or associated estimates of uncertainty (e.g. confidence intervals)
- For null hypothesis testing, the test statistic (e.g.  $F$ ,  $t$ ,  $r$ ) with confidence intervals, effect sizes, degrees of freedom and  $P$  value noted  
*Give  $P$  values as exact values whenever suitable.*
- For Bayesian analysis, information on the choice of priors and Markov chain Monte Carlo settings
- For hierarchical and complex designs, identification of the appropriate level for tests and full reporting of outcomes
- Estimates of effect sizes (e.g. Cohen's  $d$ , Pearson's  $r$ ), indicating how they were calculated

*Our web collection on [statistics for biologists](#) contains articles on many of the points above.*

### Software and code

Policy information about [availability of computer code](#)

Data collection

Data analysis

For manuscripts utilizing custom algorithms or software that are central to the research but not yet described in published literature, software must be made available to editors and reviewers. We strongly encourage code deposition in a community repository (e.g. GitHub). See the Nature Research [guidelines for submitting code & software](#) for further information.

### Data

Policy information about [availability of data](#)

All manuscripts must include a [data availability statement](#). This statement should provide the following information, where applicable:

- Accession codes, unique identifiers, or web links for publicly available datasets
- A list of figures that have associated raw data
- A description of any restrictions on data availability

Raw RNAseq data supporting the findings of this study have been deposited in the National Center for Biotechnology Information Gene Expression Omnibus (NCBI-GEO) under accession number GSE161942 at <https://www.ncbi.nlm.nih.gov/geo/query/acc.cgi?acc=GSE161942>.

GSEA analysis was performed using default parameter settings using published gene sets (MSigDB, <https://www.gsea-msigdb.org/gsea/msigdb>).

the source data underlying graphs in Figs. 1–7 and Supplementary Figs. 1-12 has been provided as a source data file. All data generated and analyzed are available from the corresponding author upon reasonable request.

## Field-specific reporting

Please select the one below that is the best fit for your research. If you are not sure, read the appropriate sections before making your selection.

Life sciences  Behavioural & social sciences  Ecological, evolutionary & environmental sciences

For a reference copy of the document with all sections, see [nature.com/documents/nr-reporting-summary-flat.pdf](https://www.nature.com/documents/nr-reporting-summary-flat.pdf)

## Life sciences study design

All studies must disclose on these points even when the disclosure is negative.

|                 |                                                                                                                                                                                                                                                                                                                                                                                                                                                       |
|-----------------|-------------------------------------------------------------------------------------------------------------------------------------------------------------------------------------------------------------------------------------------------------------------------------------------------------------------------------------------------------------------------------------------------------------------------------------------------------|
| Sample size     | The effect size is extremely high in CAR T cell experiments. In our studies, 10 mice per group would yield at least 90% power to detect a 2-fold difference in median survival based on a two-sided t-test with 5% Type I error. However, the effect sizes in CAR T cell experiments are large with animals either surviving or succumbing to the tumor; thus minimum of 4-6 animals is sufficient for these studies and was used in this manuscript. |
| Data exclusions | No data were excluded in our analyses.                                                                                                                                                                                                                                                                                                                                                                                                                |
| Replication     | all experiments were successfully replicated.                                                                                                                                                                                                                                                                                                                                                                                                         |
| Randomization   | Tumor bearing animals were randomized between treatment arms prior to initiation of therapy bases on the size of the tumor o ensure equal distribution of tumor sizes within each group. all other groups were randomly assigned.                                                                                                                                                                                                                     |
| Blinding        | The experimenter injecting T cells and imaging did not know the grouping of animals at the time of the injection. Data were collected and analyzed at a later time point. therapeutic impact of CAR-T cells on tumor bearing mice is prominent leaving little to interpretation by the observer. We believe blinding would have not impacted out study results.                                                                                       |

## Reporting for specific materials, systems and methods

We require information from authors about some types of materials, experimental systems and methods used in many studies. Here, indicate whether each material, system or method listed is relevant to your study. If you are not sure if a list item applies to your research, read the appropriate section before selecting a response.

| Materials & experimental systems    |                                                                 | Methods                             |                                                    |
|-------------------------------------|-----------------------------------------------------------------|-------------------------------------|----------------------------------------------------|
| n/a                                 | Involved in the study                                           | n/a                                 | Involved in the study                              |
| <input type="checkbox"/>            | <input checked="" type="checkbox"/> Antibodies                  | <input checked="" type="checkbox"/> | <input type="checkbox"/> ChIP-seq                  |
| <input type="checkbox"/>            | <input checked="" type="checkbox"/> Eukaryotic cell lines       | <input type="checkbox"/>            | <input checked="" type="checkbox"/> Flow cytometry |
| <input checked="" type="checkbox"/> | <input type="checkbox"/> Palaeontology and archaeology          | <input checked="" type="checkbox"/> | <input type="checkbox"/> MRI-based neuroimaging    |
| <input type="checkbox"/>            | <input checked="" type="checkbox"/> Animals and other organisms |                                     |                                                    |
| <input checked="" type="checkbox"/> | <input type="checkbox"/> Human research participants            |                                     |                                                    |
| <input checked="" type="checkbox"/> | <input type="checkbox"/> Clinical data                          |                                     |                                                    |
| <input checked="" type="checkbox"/> | <input type="checkbox"/> Dual use research of concern           |                                     |                                                    |

## Antibodies

|                 |                                                                                                                                                                                                                                                                                                                                                                                                                                                                                                                                                                                                                                                                                                                                                                                                                                                                              |
|-----------------|------------------------------------------------------------------------------------------------------------------------------------------------------------------------------------------------------------------------------------------------------------------------------------------------------------------------------------------------------------------------------------------------------------------------------------------------------------------------------------------------------------------------------------------------------------------------------------------------------------------------------------------------------------------------------------------------------------------------------------------------------------------------------------------------------------------------------------------------------------------------------|
| Antibodies used | flow cytometry: all surface antibodies were used at 1:200, except for CD3, CD4, CD8 (1:400); all intracellular antibodies were used at 1:200.<br>Anti-human:<br>PE anti-human IL-2 Biologend cat#500306<br>PE anti-human IFN- $\gamma$ Biologend cat#502508<br>PE anti-human TNF- $\alpha$ Biologend cat#502908<br>FITC anti-human CD3 Biologend cat#317305<br>Brilliant Violet 421™ anti-human CD45 Biologend cat#368521<br>PE anti-human CD107a (LAMP-1) Biologend cat#328607<br>PE anti-human CD279 (PD-1) Biologend cat#329905<br>PE anti-human CD223 (LAG-3) Biologend cat#369305<br>PE anti-human CD25 Biologend cat#302605<br>PE anti-human CD27 Biologend cat#356405<br>PE anti-human CD19 Biologend cat#392505<br>PE anti-human CD69 Biologend cat#310905<br>PE anti-human Ganglioside GD2 Biologend cat#357303<br>PE anti-human CD276 (B7-H3) Biologend cat#331605 |
|-----------------|------------------------------------------------------------------------------------------------------------------------------------------------------------------------------------------------------------------------------------------------------------------------------------------------------------------------------------------------------------------------------------------------------------------------------------------------------------------------------------------------------------------------------------------------------------------------------------------------------------------------------------------------------------------------------------------------------------------------------------------------------------------------------------------------------------------------------------------------------------------------------|

Anti mouse:  
 anti-mouse CD3ε Biolegend cat#100301  
 anti-mouse CD45 Biolegend cat#103133  
 anti-mouse CD107a Biolegend cat#121611  
 anti-mouse INFg Biolegend cat#505807  
 AffiniPure F(ab')<sub>2</sub> Fragment Goat Anti-Mouse IgG, F(ab')<sub>2</sub> fragment specific jackson immuno cat#115-006-072  
 AffiniPure F(ab')<sub>2</sub> Fragment Goat Anti-Mouse IgG, F(ab')<sub>2</sub> fragment specific-APC jackson immuno cat#115-006-072  
 AffiniPure F(ab')<sub>2</sub> Fragment Goat Anti-Mouse IgG, F(ab')<sub>2</sub> fragment specific-PE jackson immuno cat#115-006-072

Immunohistochemistry:  
 anti human CD3ε Monoclonal eBioscience cat#14-0031-82  
 anti human PHOX2B Polyclonal eBioscience cat#PA5-35044  
 Anti mouse CD3 Monoclonal eBioscience Cat #MA5-14524

## Validation

all primary anti-mouse antibodies were validated for flow cytometry by the manufacturers.

Anti-human:  
 PE anti-human IL-2 Biolegend cat#500306 <https://www.biolegend.com/en-us/products/pe-anti-human-il-2-antibody-1351?GroupID=GROUP24>  
 PE anti-human IFN-γ Biolegend cat#502508 <https://www.biolegend.com/en-us/products/pe-anti-human-ifn-gamma-antibody-1011?GroupID=GROUP24>  
 PE anti-human TNF-α Biolegend cat#502908 <https://www.biolegend.com/en-us/products/pe-anti-human-tnf-alpha-antibody-1346>  
 FITC anti-human CD3 Biolegend cat#317305 <https://www.biolegend.com/en-us/products/fitc-anti-human-cd3-antibody-3644?GroupID=GROUP28>  
 Brilliant Violet 421™ anti-human CD45 Biolegend cat#368521 <https://www.biolegend.com/en-us/products/brilliant-violet-421-anti-human-cd45-antibody-14686>  
 PE anti-human CD107a (LAMP-1) Biolegend cat#328607 <https://www.biolegend.com/en-us/products/pe-anti-human-cd107a-lamp-1-antibody-4967?GroupID=GROUP28>  
 PE anti-human CD279 (PD-1) Biolegend cat#329905 <https://www.biolegend.com/en-us/products/pe-anti-human-cd279-pd-1-antibody-4412?GroupID=GROUP28>  
 PE anti-human CD223 (LAG-3) Biolegend cat#369305 <https://www.biolegend.com/en-us/products/pe-anti-human-cd223-lag-3-antibody-13549>  
 PE anti-human CD25 Biolegend cat#302605 <https://www.biolegend.com/en-us/search-results/pe-anti-human-cd25-antibody-616?GroupID=GROUP28>  
 PE anti-human CD27 Biolegend cat#356405 <https://www.biolegend.com/en-us/products/pe-anti-human-cd27-antibody-8371>  
 PE anti-human CD19 Biolegend cat#392505 <https://www.biolegend.com/en-us/products/pe-anti-human-cd19-antibody-16209?GroupID=GROUP483>  
 PE anti-human CD69 Biolegend cat#310905 <https://www.biolegend.com/en-us/products/pe-anti-human-cd69-antibody-1672>  
 PE anti-human Ganglioside GD2 Biolegend cat#357303 <https://www.biolegend.com/en-us/products/pe-anti-human-ganglioside-gd2-antibody-8408>  
 PE anti-human CD276 (B7-H3) Biolegend cat#331605 <https://www.biolegend.com/fr-ch/products/pe-anti-human-cd276-b7-h3-antibody-5573>

Anti mouse:  
 FITC anti-mouse CD3ε Biolegend cat#100305 <https://www.biolegend.com/en-us/products/fitc-anti-mouse-cd3epsilon-antibody-23>  
 Brilliant Violet 421™ anti-mouse CD45 Biolegend cat#103133 <https://www.biolegend.com/en-us/products/brilliant-violet-421-anti-mouse-cd45-antibody-7253>  
 PE anti-mouse CD107a Biolegend cat#121611 <https://www.biolegend.com/en-us/products/pe-anti-mouse-cd107a-lamp-1-antibody-4605>  
 PE anti-mouse INFg Biolegend cat#505807 <https://www.biolegend.com/en-us/products/pe-anti-mouse-ifn-gamma-antibody-997>  
 AffiniPure F(ab')<sub>2</sub> Fragment Goat Anti-Mouse IgG, F(ab')<sub>2</sub> fragment specific jackson immuno cat#115-006-072 <https://www.jacksonimmuno.com/catalog/products/115-006-072>  
 AffiniPure F(ab')<sub>2</sub> Fragment Goat Anti-Mouse IgG, F(ab')<sub>2</sub> fragment specific-APC jackson immuno cat#115-006-072 <https://www.jacksonimmuno.com/catalog/products/115-136-072>  
 AffiniPure F(ab')<sub>2</sub> Fragment Goat Anti-Mouse IgG, F(ab')<sub>2</sub> fragment specific-PE jackson immuno cat#115-006-072 <https://www.jacksonimmuno.com/catalog/products/115-136-072>

Immunohistochemistry:  
 anti human CD3ε Monoclonal eBioscience cat#14-0031-82 <https://www.thermofisher.com/antibody/product/CD3ε-Antibody-clone-145-2C11-Monoclonal/14-0031-82>  
 anti human PHOX2B Polyclonal eBioscience cat#PA5-35044 <https://www.thermofisher.com/antibody/product/PHOX2B-Antibody->

Polyclonal/PA5-35044  
Anti mouse CD3 Monoclonal eBioscience Cat #MA5-14524 <https://www.thermofisher.com/antibody/product/CD3e-Antibody-clone-SP7-Monoclonal/MA5-14524>

## Eukaryotic cell lines

Policy information about [cell lines](#)

|                                                                   |                                                                                                                                                                                                                                                                                                                                                                                                                                                                                                                                                                                                                                                                                                                                                                                                                                                                 |
|-------------------------------------------------------------------|-----------------------------------------------------------------------------------------------------------------------------------------------------------------------------------------------------------------------------------------------------------------------------------------------------------------------------------------------------------------------------------------------------------------------------------------------------------------------------------------------------------------------------------------------------------------------------------------------------------------------------------------------------------------------------------------------------------------------------------------------------------------------------------------------------------------------------------------------------------------|
| Cell line source(s)                                               | NB9464D is derived from murine TH-MYCN mice backcrossed to C57/B6J and transduced with murine GD2-GD3 synthetase. 282, 844 murine NBL cell lines were derived from TH-MYCN 129/SvJ mice. CHLA136, CHLA255, SKN-(BE)2, LAN5, LAN6 human NBL cell lines were derived from patients with progressive disease. Human cell lines were either established at CHLA or obtained from the Children's Oncology Group (COG) Cell Culture and Xenograft Repository ( <a href="http://www.COGcell.org">www.COGcell.org</a> ). GD2 expressing LAN6 (LAN6GD2+) cell lines were constructed by transducing wildtype LAN6 cells with GD2 synthase (B4GALNT1) and GD3 synthase (ST8SIA1). GFP and Luciferase positive cell lines were generated for in vitro and in vivo experiments using lentiviral expression. 293 T, Jurkat and Raji and Eco-phoenix are purchased from ATCC. |
| Authentication                                                    | We validate each cell line every 6 months by frequent STR mapping                                                                                                                                                                                                                                                                                                                                                                                                                                                                                                                                                                                                                                                                                                                                                                                               |
| Mycoplasma contamination                                          | Cells lines tested negative for mycoplasma contamination prior to sample generation. Samples were confirmed negative using MycoAlert (Lonza) Mycoplasma Detection Kit.                                                                                                                                                                                                                                                                                                                                                                                                                                                                                                                                                                                                                                                                                          |
| Commonly misidentified lines (See <a href="#">ICLAC</a> register) | No commonly misidentified cell lines were used.                                                                                                                                                                                                                                                                                                                                                                                                                                                                                                                                                                                                                                                                                                                                                                                                                 |

## Animals and other organisms

Policy information about [studies involving animals](#); [ARRIVE guidelines](#) recommended for reporting animal research

|                         |                                                                                                                                                                                                                                                                                                                                                                                                                                                                                                                                                                                                                                                                                                                                                                                                                                                     |
|-------------------------|-----------------------------------------------------------------------------------------------------------------------------------------------------------------------------------------------------------------------------------------------------------------------------------------------------------------------------------------------------------------------------------------------------------------------------------------------------------------------------------------------------------------------------------------------------------------------------------------------------------------------------------------------------------------------------------------------------------------------------------------------------------------------------------------------------------------------------------------------------|
| Laboratory animals      | Mice used are C57B6 and NSG (NOD.Cg-Prkdc-scid /lLrg-tm1Wjl/SzJ, Jackson Laboratory) strains; males and females are equally used at 4-6 weeks of age for each experiment. Animals were housed in the Unit for animal care facility at the Children's Hospital of Los Angeles in compliance with the Institutional Animal Care and Use Committee regulations. Housing conditions at Children Hospital of Los Angeles: Mice were maintained in a specific pathogen free unit on a 13hr light: 11hr dark cycle. The animal rooms are provided with 100% fresh, HEPA filtered air at 10-15 air changes per hour. Room temperatures are controlled by a dedicated system within each room, and are maintained within the range of 72°F ± 2° F. Humidity levels are also controlled by a dedicated system within each room, maintained between 30-70% RH. |
| Wild animals            | no wild animals were used in this study                                                                                                                                                                                                                                                                                                                                                                                                                                                                                                                                                                                                                                                                                                                                                                                                             |
| Field-collected samples | no field-collected samples were used in this study                                                                                                                                                                                                                                                                                                                                                                                                                                                                                                                                                                                                                                                                                                                                                                                                  |
| Ethics oversight        | the Institute Animal Care and Use Committee (IACUC) at Children's Hospital of Los Angeles                                                                                                                                                                                                                                                                                                                                                                                                                                                                                                                                                                                                                                                                                                                                                           |

Note that full information on the approval of the study protocol must also be provided in the manuscript.

## Flow Cytometry

### Plots

Confirm that:

- The axis labels state the marker and fluorochrome used (e.g. CD4-FITC).
- The axis scales are clearly visible. Include numbers along axes only for bottom left plot of group (a 'group' is an analysis of identical markers).
- All plots are contour plots with outliers or pseudocolor plots.
- A numerical value for number of cells or percentage (with statistics) is provided.

### Methodology

|                           |                                                                                                                         |
|---------------------------|-------------------------------------------------------------------------------------------------------------------------|
| Sample preparation        | Various in vitro and in vivo experiments with different sample preparation were used as stated in the manuscript.       |
| Instrument                | LSRII 3 laser BD flow cytometer                                                                                         |
| Software                  | BD FACSDiva software (v 8.0.3) was used to collect flow cytometry data. Flowjo (ver. 10.6) was used to analyze the data |
| Cell population abundance | No sorting was conducted                                                                                                |
| Gating strategy           | Gating strategy is explained in the Methods section of the manuscript.                                                  |

Tick this box to confirm that a figure exemplifying the gating strategy is provided in the Supplementary Information.
